# Supplementary material for: The wax gourd genomes offer insights into the genetic diversity and ancestral cucurbit karyotype
Source: PubMed Central journal article supplement (PMC6856369; doi:10.1038/s41467-019-13185-3), 2019-11-14
Supplement: 41467_2019_13185_MOESM1_ESM.pdf [file 41467_2019_13185_MOESM1_ESM.pdf]

**The wax gourd genomes offer insights into the genetic diversity and  
ancestral cucurbit karyotype**

*Xie et al.*

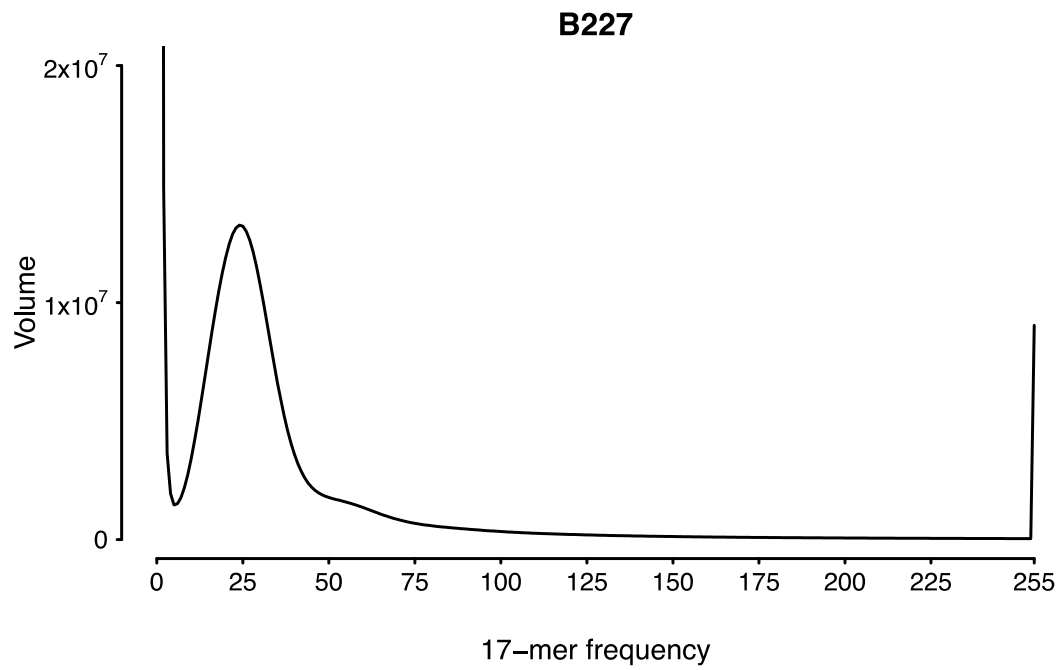

**Supplementary Figure 1. Distribution of 17k-mer depth for the Illumina reads.**  
Source data are provided as a Source Data file.

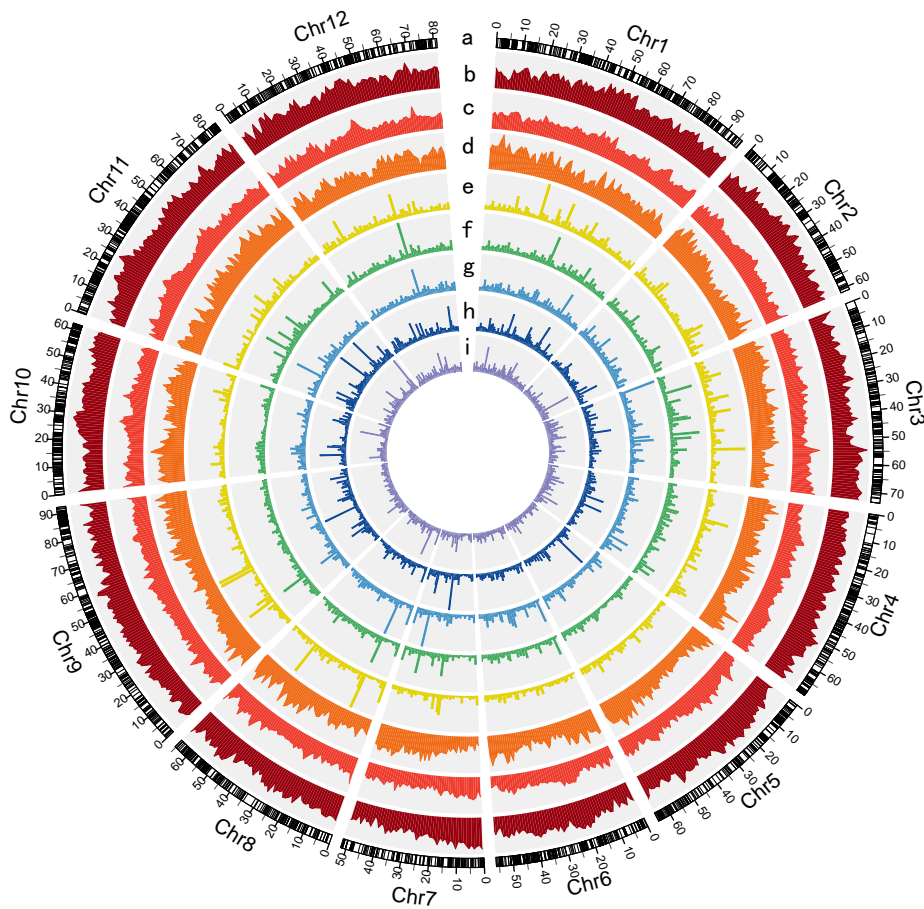

**Supplementary Figure 2. Wax gourd genome.** **a** Genetic markers distribution across 12 chromosomes. **b** Repeat coverage (50-90%). **c** GC content (30-40%). **d** Gene density (0-60). **e-i** Gene expression profile in root, stem, leaf, flower and fruit respectively (FPKM: 0-100). **b-i** are drawn in non-overlapping 1 Mb sliding windows.

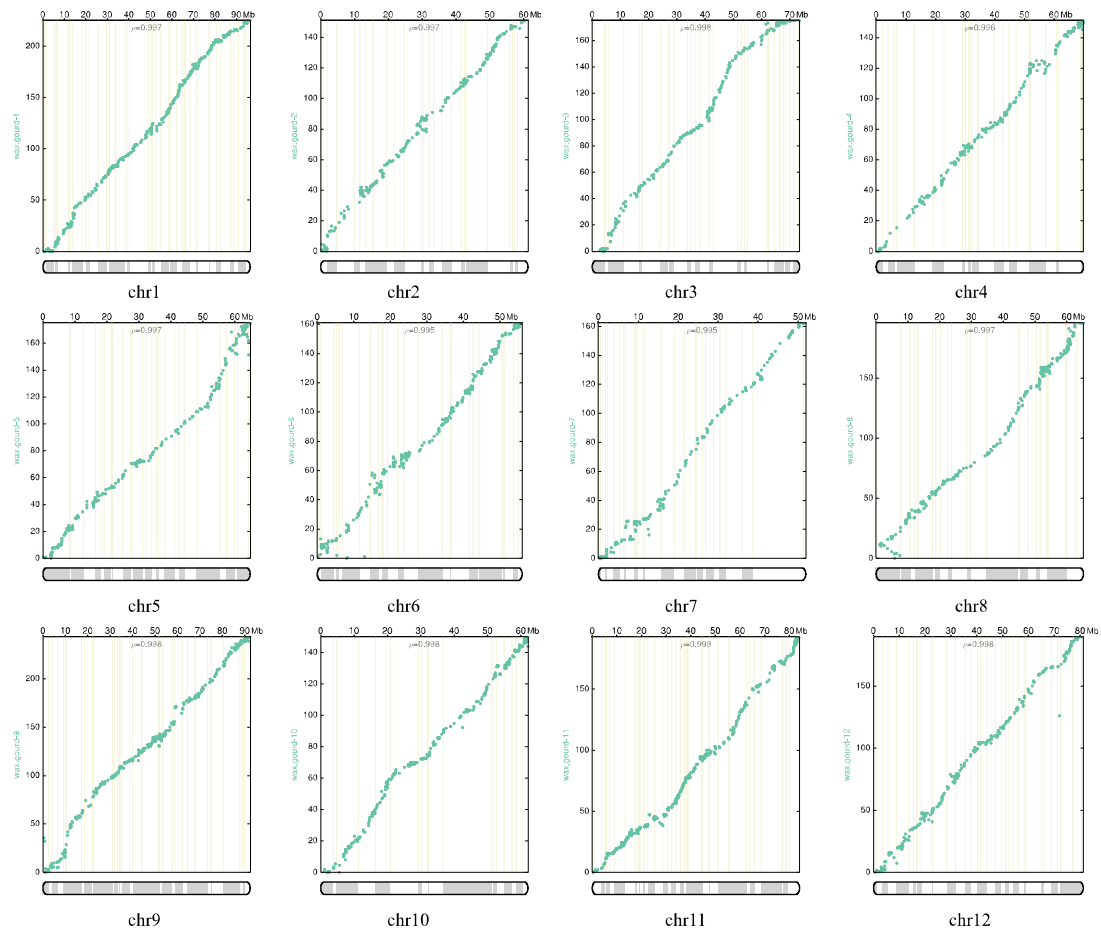

**Supplementary Figure 3. Consistence of the wax gourd genome assembly with the high-density genetic map.** The horizontal axes show the assembled scaffolds as boxes with grey white alternating shades on the pseudo-chromosomes. The vertical ones represent the genetic distance in the genetic map.

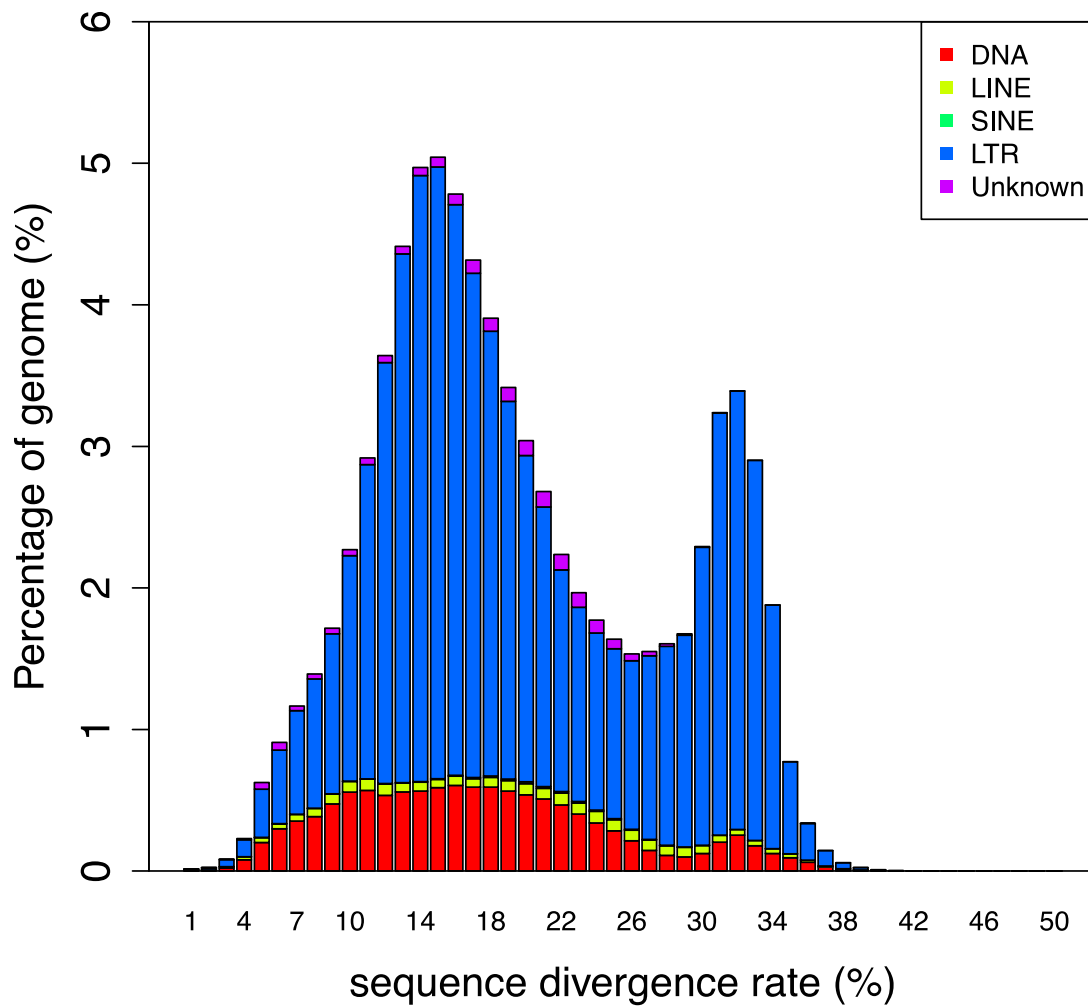

**Supplementary Figure 4. The divergence rates of repeats in the wax gourd genome.** Divergence rate: percentage of substitutions in the matching region compared with consensus sequence in the repeat library. Source data are provided as a Source Data file.

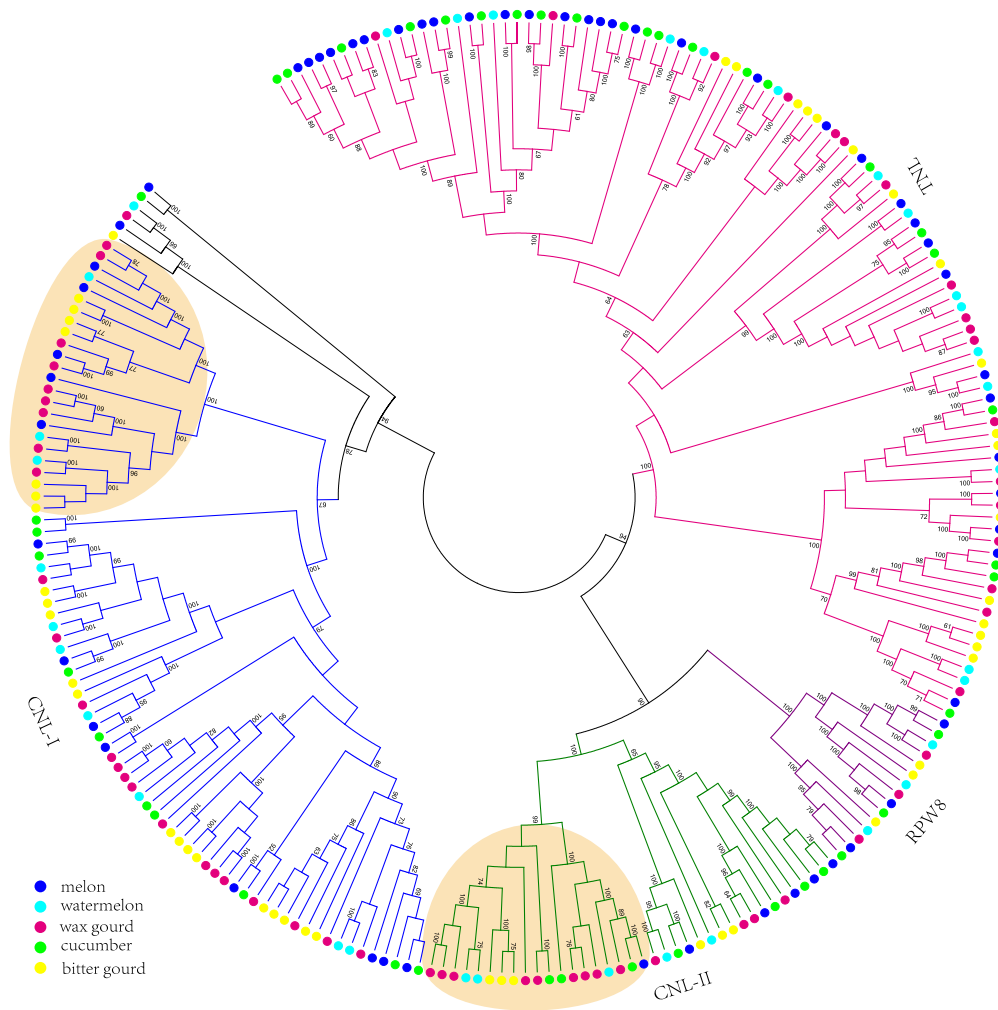

**Supplementary Figure 5. Phylogenetic tree of NBS R genes in five *Cucurbitaceae* species.** Cucumber, melon, watermelon, bitter gourd, and wax gourd were involved in the analyses. The tree was generated using protein sequences of the conserved NB-ARC domain.

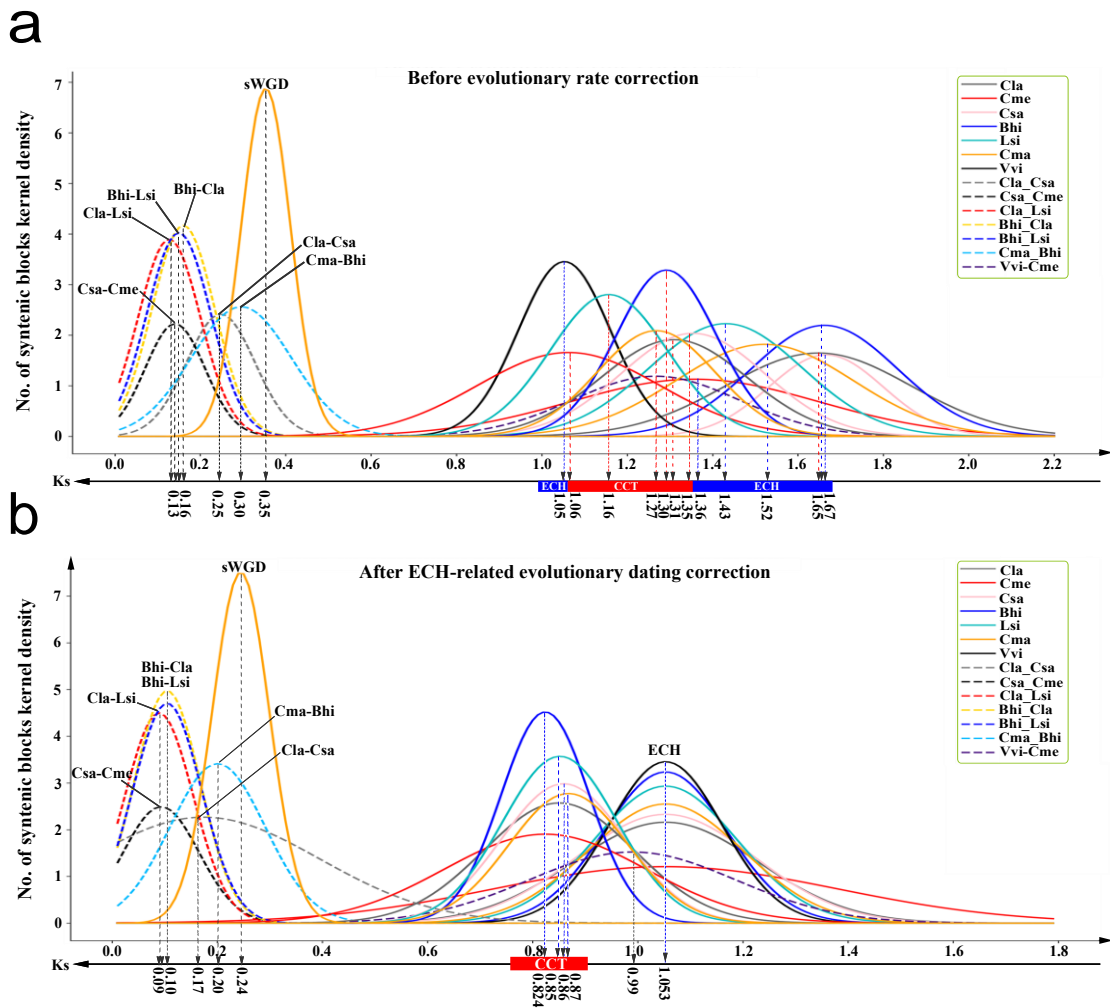

**Supplementary Figure 6. Distribution of average synonymous substitution levels between collinear gene pairs in intergenomic blocks and intragenomic blocks. Ks:** synonymous substitution. Solid curves: intergenomic blocks. Dashed curves: intragenomic blocks. **a** Before Ks correction. **b** After Eudicot-common hexaploidy (ECH) related evolutionary rate correction. Bhi: *Benincasa.hispida*, Cma: *Cucurbit maxima*, Cme: *Cucumis melo*, Lsi: *Lagenaria siceraria*, Cla: *Citrullus lanatus*, Csa: *Cucumis sativus*, Vvi: *Vitis vinifera*.

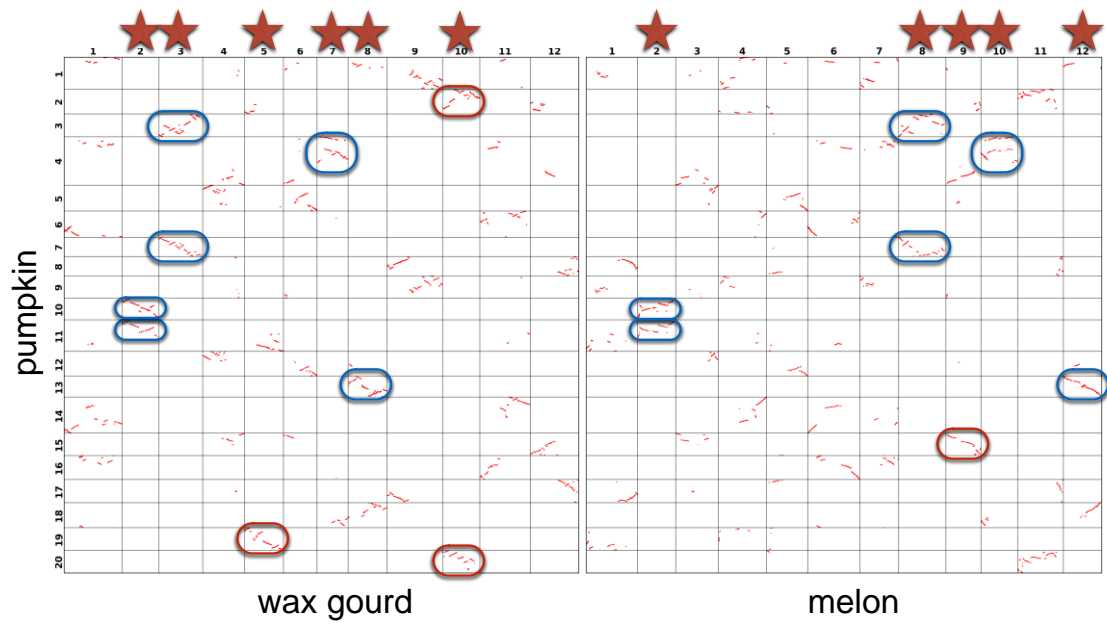

**Supplementary Figure 7. The syntenic dotplots of wax gourd and melon versus pumpkin genome.** The chromosomes marked by asterisk mean the whole chromosome have been well preserved in pumpkin genome. Source data are provided as a Source Data file.



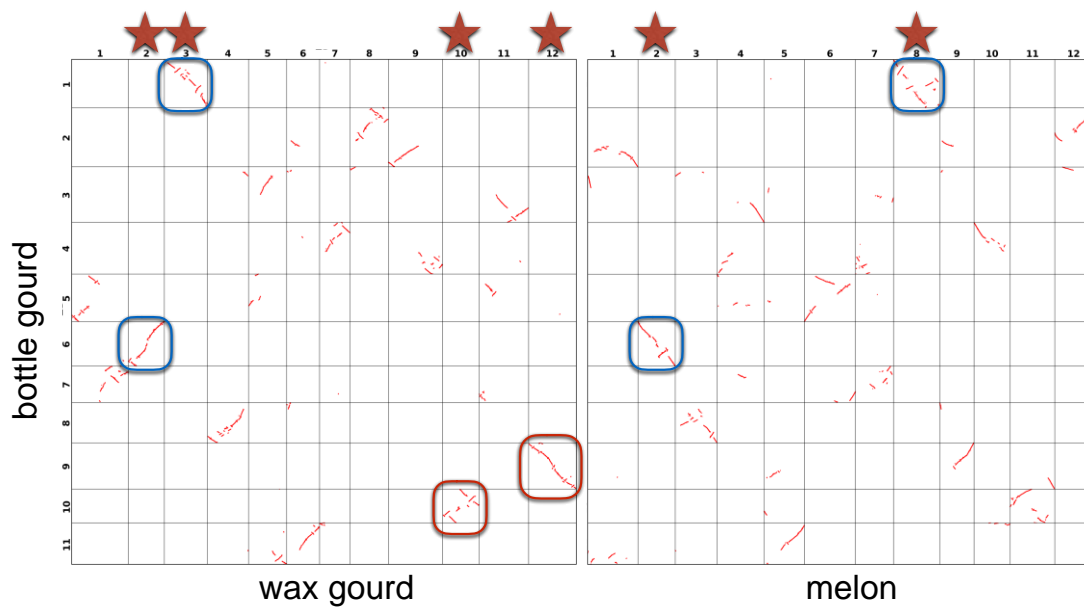

**Supplementary Figure 8. The syntenic dotplot of wax gourd and melon versus bottle gourd.** Source data are provided as a Source Data file.

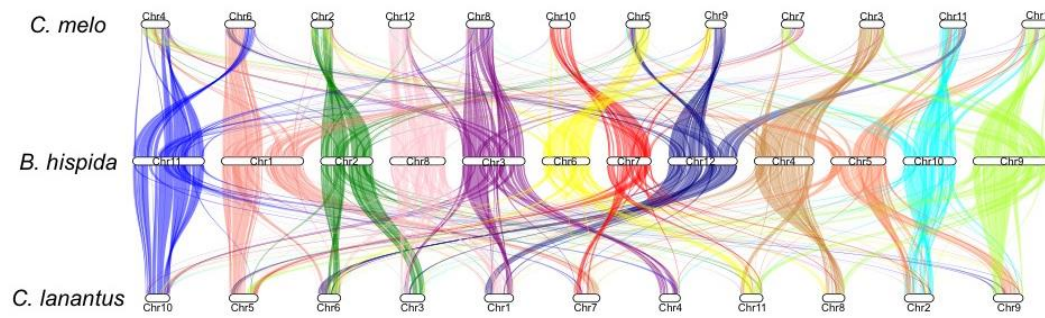

**Supplementary Figure 9. Syntenic relationships across three genomes.**

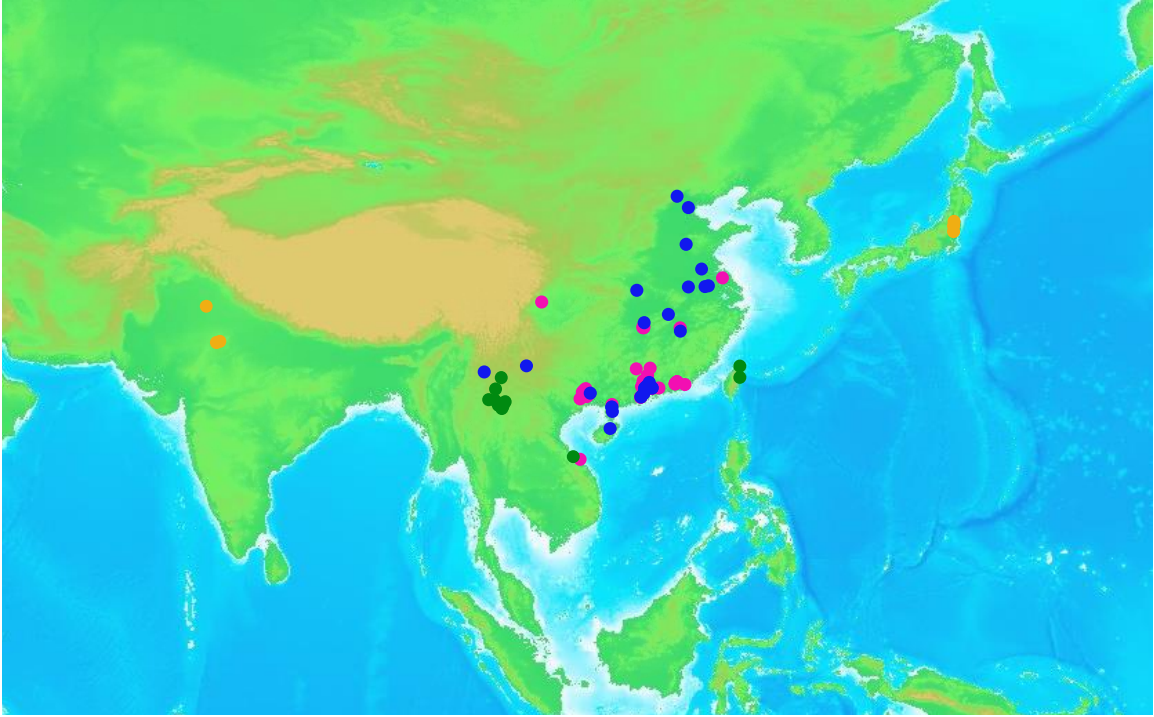

**Supplementary Figure 10. The geographic distribution of the 146 accessions.** Each accession is represented by a dot on the map. Magenta: cultivated wax gourds without wax; blue: cultivated ones with wax; green: Xishuangbanna landraces; orange: wild ones. The map was generated using the QGIS software (QGIS3.4; <https://www.qgis.org/en/site/about/index.html>).

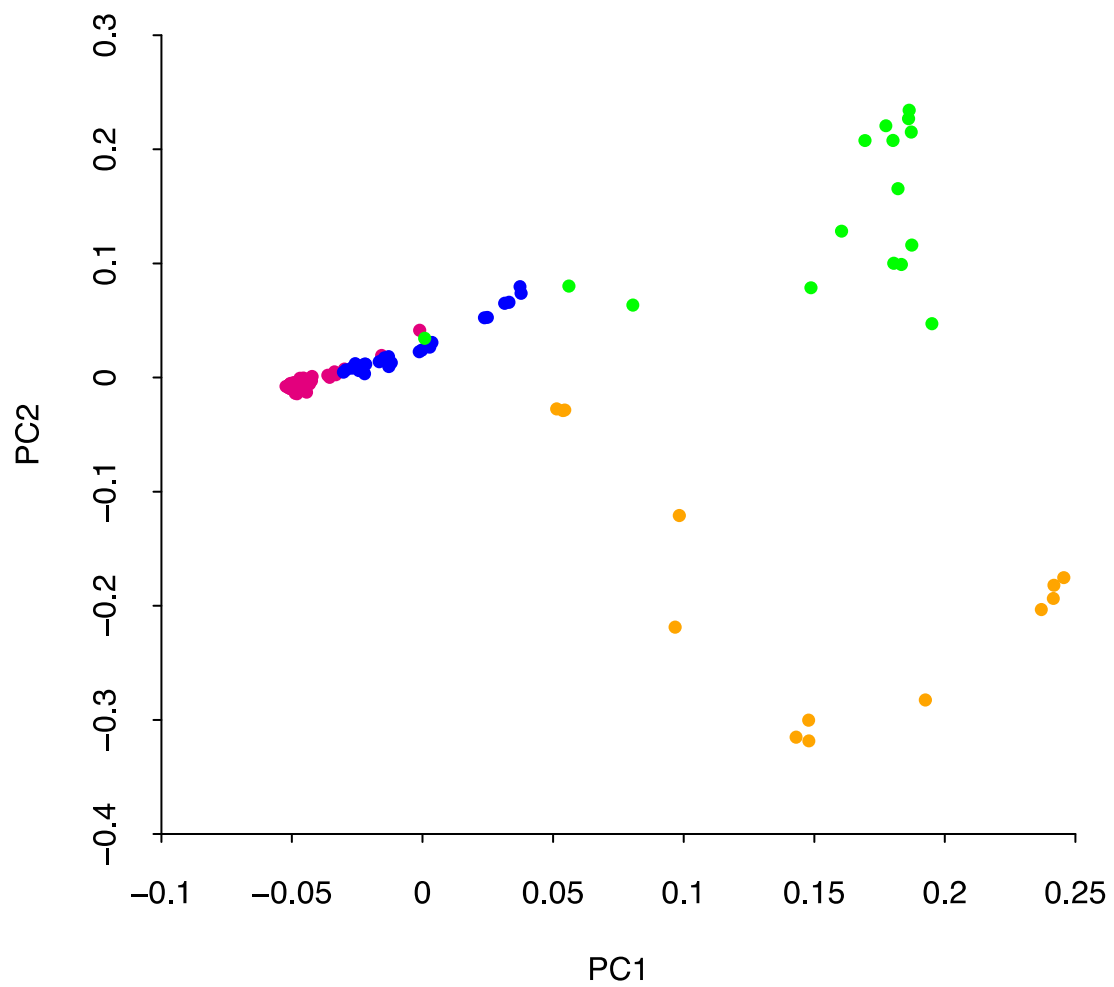

**Supplementary Figure 11. Principal component analysis of the 146 wax gourd accessions.** Source data are provided as a Source Data file.

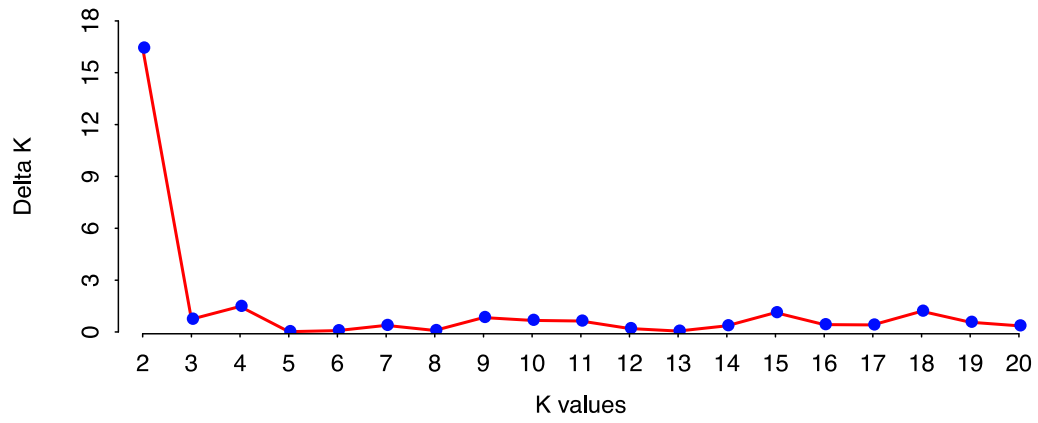

**Supplementary Figure 12. Delta K analysis for the number of groups for the 146 wax gourd accessions.**

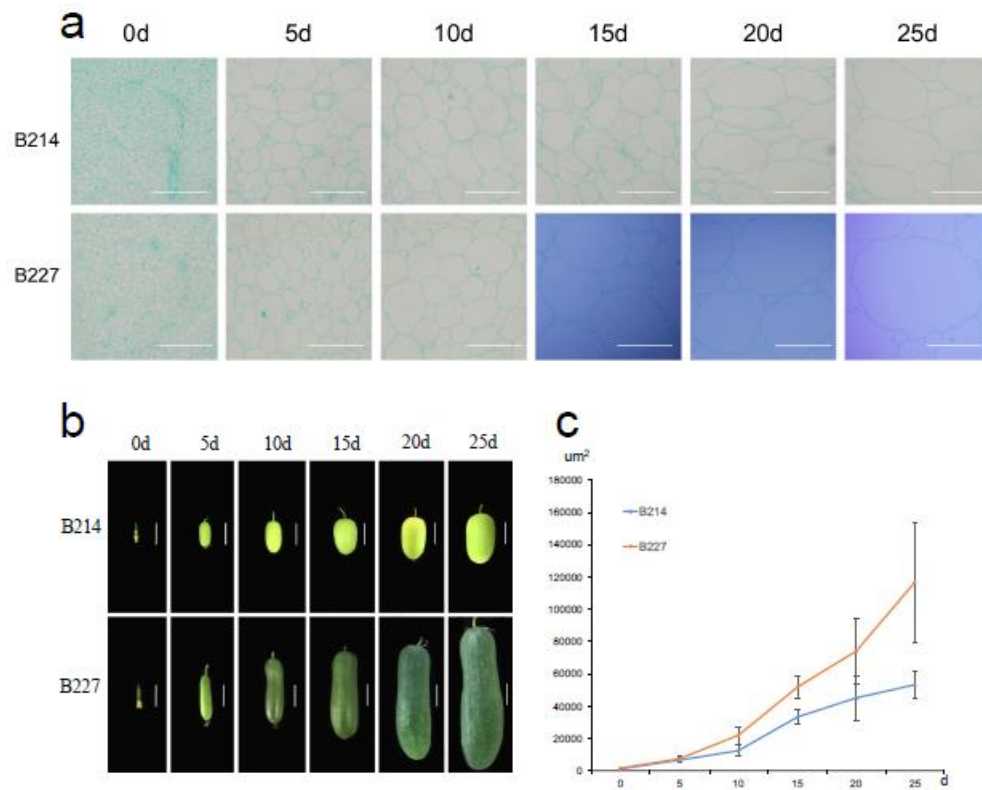

**Supplementary Figure 13. Histological and morphology of wax gourd fruit. a.** Morphology of cell size during fruit development Bar = 200um. **b.** Images of typical fruits during development, Bar = 10cm. **c.** Increase of cell volume from accession B214 and B227 from the longitudinal section. Error bars represent  $\pm$  sd.

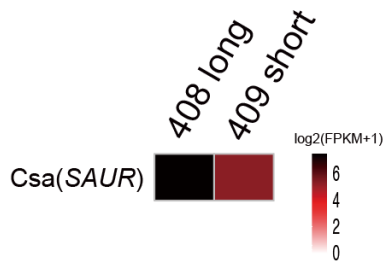

**Supplementary Figure 14. Differential expression of SAUR gene in two cucumber near isogenic lines.**

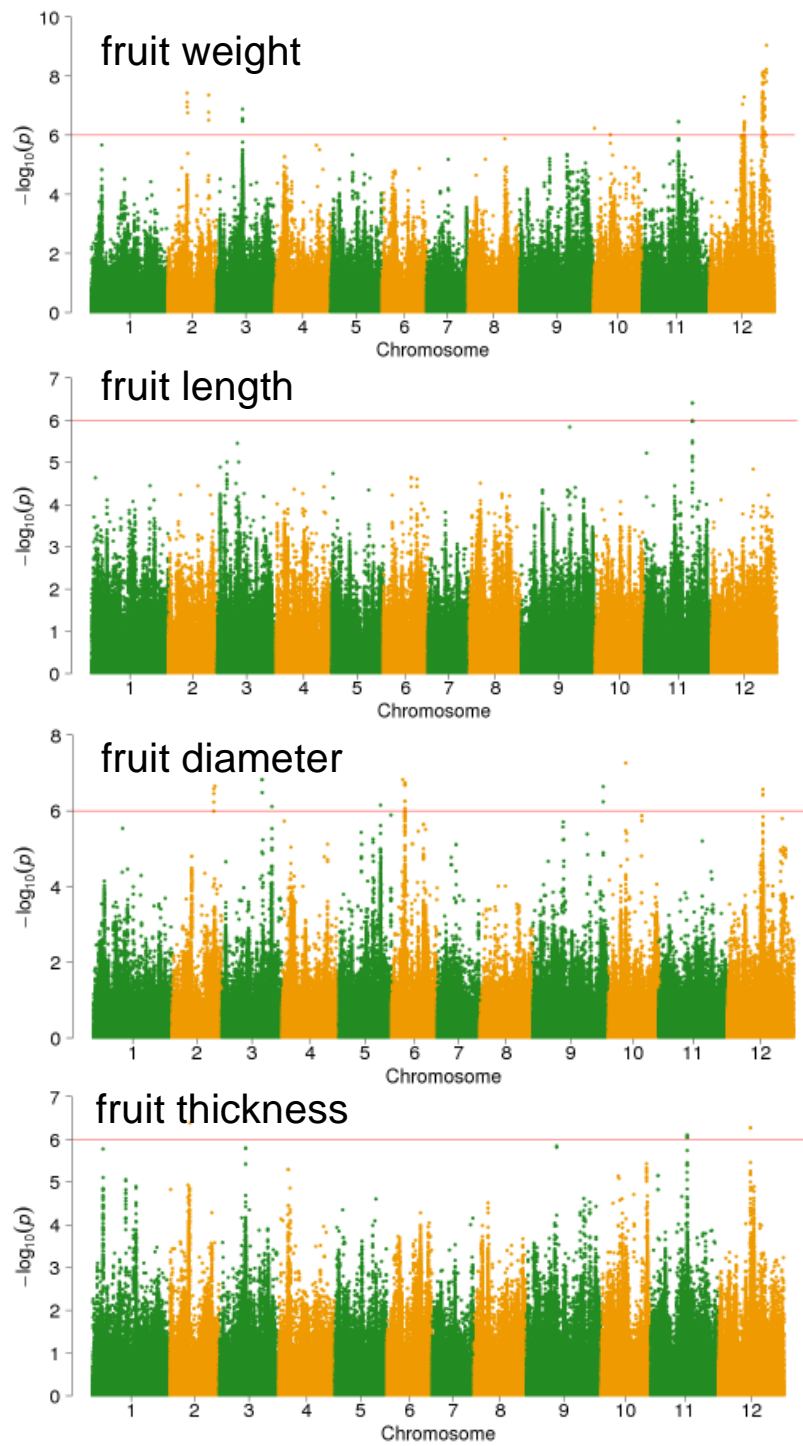

**Supplementary Figure 15. GWAS results of fruit traits in wax gourd genome.**



**Supplementary Table 1. Summary of the sequencing data for wax gourd.**

| Library type     | Library insert size | Data (Gb)   | Read length |       | GC(%) |       | Q30   |       |
|------------------|---------------------|-------------|-------------|-------|-------|-------|-------|-------|
|                  |                     |             | Read1       | Read2 | Read1 | Read2 | Read1 | Read2 |
| <b>Pair-end</b>  | 180bp               | 18.7        | 100         | 100   | 33.3  | 33.3  | 97    | 97    |
|                  | 500bp               | 1.0         | 100         | 100   | 36.3  | 36.3  | 98    | 92    |
|                  | 500bp               | 9.6         | 100         | 100   | 36.1  | 36.2  | 97    | 93    |
| <b>Mate-pair</b> | 2kb                 | 0.9         | 91.6        | 91.4  | 38.5  | 38.6  | 95    | 93    |
|                  | 2kb                 | 0.4         | 100         | 100   | 38.4  | 38.5  | 96    | 94    |
|                  | 2kb                 | 9.4         | 100         | 100   | 38.6  | 38.7  | 95    | 96    |
|                  | 8kb                 | 0.4         | 100         | 100   | 37.3  | 37.4  | 97    | 96    |
|                  | 8kb                 | 1.0         | 93.2        | 92.9  | 37.0  | 36.8  | 88    | 85    |
| <b>PacBio</b>    |                     | 15          |             |       |       |       |       |       |
|                  | <b>total</b>        | <b>55.4</b> |             |       |       |       |       |       |

**Supplementary Table 2. Summary of gapped regions.**

| <b>Chromosome</b> | <b>Size of N base (bp)</b> |
|-------------------|----------------------------|
| <b>chr10</b>      | 947,933                    |
| <b>chr11</b>      | 1,254,718                  |
| <b>chr12</b>      | 1,099,274                  |
| <b>chr1</b>       | 1,359,133                  |
| <b>chr2</b>       | 1,029,499                  |
| <b>chr3</b>       | 1,068,153                  |
| <b>chr4</b>       | 1,109,909                  |
| <b>chr5</b>       | 955,781                    |
| <b>chr6</b>       | 914,502                    |
| <b>chr7</b>       | 907,125                    |
| <b>chr8</b>       | 1,033,663                  |
| <b>chr9</b>       | 1,498,830                  |
| <b>contigs</b>    | 1,600,148                  |
| <b>Total</b>      | <b>14,778,668</b>          |

**Supplementary Table 3. Summary of contigs.**

| <b>Contig</b>       | <b>Size(bp)</b> |
|---------------------|-----------------|
| <b>Total length</b> | 898,172,958     |
| <b>Count</b>        | 26,315          |
| <b>Average</b>      | 34,132          |
| <b>Median</b>       | 19,501          |
| <b>N00</b>          | 479,328         |
| <b>N10</b>          | 164,196         |
| <b>N20</b>          | 126,004         |
| <b>N30</b>          | 101,266         |
| <b>N40</b>          | 83,251          |
| <b>N50</b>          | 68,515          |
| <b>N60</b>          | 55,048          |
| <b>N70</b>          | 42,867          |
| <b>N80</b>          | 30,679          |
| <b>N90</b>          | 18,560          |
| <b>N100</b>         | 349             |

**Supplementary Table 4. Summary of predicted repeat sequences in the wax gourd genome.**

| Repeat sequence type                 |                                  | Copy number    | Sequence length (Mb) | Percentage (%) |
|--------------------------------------|----------------------------------|----------------|----------------------|----------------|
| <b>Dispersed repeat</b>              | <b>DNA transposable elements</b> | <b>310,469</b> | <b>94.06</b>         | <b>10.30</b>   |
|                                      | CMC                              | 18,688         | 8.56                 | 0.94           |
|                                      | hAT                              | 42,093         | 13.78                | 1.51           |
|                                      | Helitron                         | 1,132          | 0.32                 | 0.04           |
|                                      | MuLE                             | 46,675         | 19.19                | 2.10           |
|                                      | PIF                              | 10,903         | 3.25                 | 0.36           |
|                                      | TcMar                            | 87             | 0.008                | 0.001          |
|                                      | other                            | 190,891        | 48.96                | 5.36           |
|                                      | <b>RNA transposable elements</b> | <b>769,754</b> | <b>545.39</b>        | <b>59.73</b>   |
|                                      | non-LTR RT                       |                |                      |                |
|                                      | LINE                             | 57,565         | 16.20                | 1.77           |
|                                      | SINE                             | 11,350         | 1.10                 | 0.12           |
|                                      | LTR RT                           |                |                      |                |
|                                      | Copia                            | 376,614        | 329.41               | 36.08          |
|                                      | Gypsy                            | 201,768        | 142.45               | 15.50          |
| other                                | 122,457                          | 56.22          | 6.12                 |                |
| <b>Unknown transposable elements</b> | <b>44,510</b>                    | <b>12.95</b>   | <b>1.42</b>          |                |
| <b>Tandem repeat</b>                 | <b>Microsatellite</b>            | <b>34,509</b>  | <b>1.48</b>          | <b>0.16</b>    |
|                                      | <b>Minisatellite</b>             | <b>301,262</b> | <b>23.91</b>         | <b>2.62</b>    |
|                                      | <b>Satellite</b>                 | <b>21,343</b>  | <b>11.72</b>         | <b>1.28</b>    |

**Supplementary Table 5. Functional annotation of the wax gourd protein-coding genes.**

| <b>Type</b>        | <b>Number</b> | <b>Percentage (%)</b> |
|--------------------|---------------|-----------------------|
| <b>Total</b>       | 27,467        | 100                   |
| <b>NR</b>          | 21,002        | 76.46                 |
| <b>InterPro</b>    | 17,767        | 64.68                 |
| <b>Swiss-port</b>  | 20,770        | 75.62                 |
| <b>Arabidopsis</b> | 20,480        | 74.56                 |
| <b>GO</b>          | 17,767        | 64.68                 |
| <b>Annotated</b>   | 21,227        | 77.28                 |

**Supplementary Table 6. NBS-LRR genes in different genomes.**

| <b>Species</b>      | <b>Number</b> | <b>Full NB - ARC domain</b> |
|---------------------|---------------|-----------------------------|
| <b>Cucumber</b>     | 74            | 43                          |
| <b>Melon</b>        | 84            | 56                          |
| <b>Wax gourd</b>    | 82            | 59                          |
| <b>Water melon</b>  | 49            | 34                          |
| <b>Bitter gourd</b> | 78            | 48                          |
| <b>Soybean</b>      | 164           | NA                          |
| <b>Arabidopsis</b>  | 251           | NA                          |
| <b>Grape</b>        | 330           | NA                          |
| <b>Tomato</b>       | 265           | NA                          |
| <b>Rice</b>         | 535           | NA                          |

NA: Not analyzed

**Supplementary Table 7. Comparisons of gene models between the wax gourd and the other three *Cucurbitaceae* species.**

|                              | <b>Wax gourd</b> | <b>Cucumber</b> | <b>Melon</b> | <b>Watermelon</b> |
|------------------------------|------------------|-----------------|--------------|-------------------|
| <b>Genome size(Mb)</b>       | 913              | 196             | 407          | 355               |
| <b>Gene number</b>           | 27,467           | 24,274          | 27,427       | 23,440            |
| <b>Mean gene size(bp)</b>    | 3,962            | 3,674           | 2,776        | 2,770             |
| <b>Mean CDs size(bp)</b>     | 1,098            | 1,149           | 950          | 1,109             |
| <b>Mean exon size(bp)</b>    | 328              | 276             | 271          | 242               |
| <b>Mean exon number/gene</b> | 6.6              | 7.1             | 4.6          | 4.6               |
| <b>Mean intron size(bp)</b>  | 1,044            | 814             | 506          | 654               |

**Supplementary Table 8. Comparisons of the repeats content.**

| <b>RT_type</b>   | <b>Watermelon</b> | <b>Cucumber</b> | <b>Melon</b> | <b>Wax gourd</b> |
|------------------|-------------------|-----------------|--------------|------------------|
| <b>DNA_RT</b>    | 6.35              | 22.07           | 27.46        | 94.06            |
| <b>LINE</b>      | 10.43             | 10.26           | 4.52         | 16.20            |
| <b>SINE</b>      | 0.01              | 0.49            | 0.29         | 1.10             |
| <b>LTR_Copia</b> | 35.06             | 15.99           | 38.39        | 329.41           |
| <b>LTR_Gypsy</b> | 20.48             | 12.53           | 25.16        | 142.45           |
| <b>LTR_other</b> | 28.97             | 8.74            | 3.92         | 56.22            |
| <b>Unknown</b>   | 32.74             | 1.02            | 26.60        | 12.95            |

Note: repeat content: Mb.
