# Supplementary material for: The wax gourd genomes offer insights into the genetic diversity and ancestral cucurbit karyotype
Source: PubMed Central journal article supplement (PMC6856369; doi:10.1038/s41467-019-13185-3), 2019-11-14
Supplement: 41467_2019_13185_MOESM2_ESM.pdf [file 41467_2019_13185_MOESM2_ESM.pdf]

1 First round of review

2 Reviewers' comments:

3 Reviewer #1 (Remarks to the Author):

4 The current manuscript describe a comprehensive genomic effort focused on wax  
5 gourd and its relation with other cucurbit species. The authors started by creating a  
6 draft de novo assembly of the genome of this plant, which may be used as a first  
7 reference genome for this species. Then they performed various comparative and  
8 evolutionary analyses to describe ancestry and evolutionary processes across cucurbit  
9 species. Finally, they describe the population structure and genetic variation across  
10 wax gourd diverse collection and the mapping of fruit morphology traits. Assembly of  
11 a genome for additional cucurbits species is valuable for the evolutionary analysis of  
12 this important family and will provide valuable data for that purpose. Assembly of a  
13 reference genome for *Benincasa hispida* is of interest to this crop community and will  
14 encourage and facilitate further and more effective genetic research in this species.

15 While this manuscript includes comprehensive genomic information, its major  
16 weakness is in the part of the trait mapping data and the associations that are proposed  
17 between genetic variation and fruit morphology traits. In that respect, the claim in the  
18 abstract ("we found that genes involved in plant hormone signaling and cell cycle  
19 regulation likely contribute to the large fruit size ") is an overstatement as it is  
20 supported by weak experimental results in the manuscript.

21 [Response:](#)

22 [Thanks for your comments. To facilitate the identification of the candidate genes for](#)  
23 [fruit size, we have now added the RNA-seq data of fruit at three \(0,10 and 20 days](#)  
24 [after pollination\[DAP\]\) developmental stages for both wax gourd accession B227](#)  
25 [bearing large fruit and B214 with small fruit. The differentially expressed genes](#)  
26 [\(DEGs\) were identified and analyzed, and in total, 1,642, 4,320 and 4,307 genes were](#)  
27 [identified as DEGs \(Response Data 1-3\) at 0, 10 and 20 DAP, respectively \(Response](#)  
28 [Fig.1\). To avoid confusion and overstatement, we have also rephrased the abstract.](#)

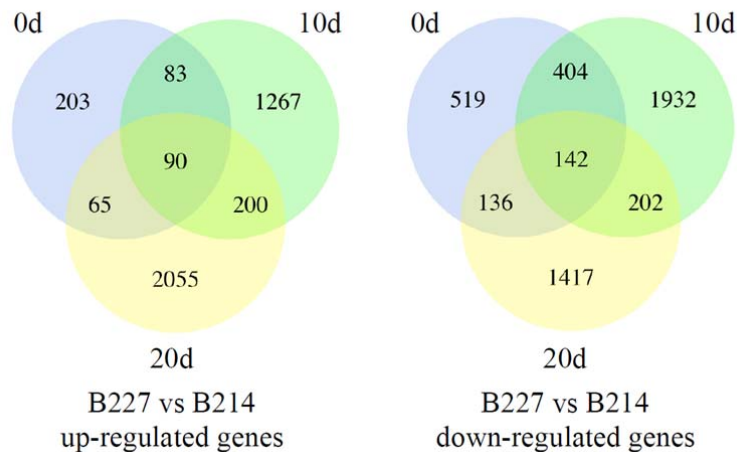

29

30 [Response Fig. 1](#) Overlap of differentially expressed genes between large (B227) and  
 31 [small \(B214\) fruited-accession across three fruit developmental stages.](#)

32 Specific comments:

33 1. [Supplementary Fig. 3](#) show the relation between genetic and physical maps across  
 34 the 12 wax gourd chromosomes. The pattern is almost linear across all  
 35 chromosomes. This is very uncommon as there is usually variation in  
 36 recombination frequency within chromosomes and in particular low  
 37 recombination rate at the centromeric regions. This is not reflected here and  
 38 require explanation. Also on this figure, what are the white and gray patterns on  
 39 the chromosomes bellow each box?

40 [Response:](#)

41 [Although the relation between genetic and physical maps is almost linear, we do](#)  
 42 [observe several regions showing low recombination, such as the region on the](#)  
 43 [chromosome 5. As mentioned in the manuscript, the wax gourd genome could have](#)  
 44 [retained the most ancestral cucurbit karyotype. It has a particularly large genome, and](#)  
 45 [the repetitive sequences were greatly expanded compared with other cucurbits. This](#)  
 46 [implies that wax gourd genome may have a special genome organization. The genetic](#)  
 47 [and physical map were significantly consistence, indicating the high degree of](#)  
 48 [accuracy of the assembly.](#)

49 The white and gray patterns on the chromosomes indicate different scaffolds. The  
50 information was added in the Supplementary Fig. 3.

51 2. The table to the right of Fig. 1a needs a legend explanation.

52 Response:

53 We added a legend for the table to the right of Fig. 1a.

54 3. Figure 2a is complicated and visually challenging. In addition, it needs to be  
55 described a bit more either through methods or at the results. It was unclear to me  
56 how ancestral chromosomes were determined.

57 Response:

58 To clarify the process to infer the ancestral chromosomes, more detailed information  
59 was included in the Methods section of the revised manuscript.

60 4. In Fig. 4c, not clear what is the purpose of plotting  $K=2,3,4$  and not just  $k=4$   
61 which the best clustering model that is proposed.

62 Response:

63 Yes,  $k=4$  is the best clustering model. However, if only the model of  $k=4$  is shown,  
64 the relationship between the accessions of the Landrace group and that of the Wild  
65 group would not be clear. To help better understand the relationships of these  
66 accessions, we presented the results of different cluster numbers ( $K = 2, 3$  and  $4$ ).

67 5. Reduction of nucleotide diversity to detect candidate regions of domestication and  
68 improvement - It is reported here that 10%-15% of the wax gourd genome show  
69 signature of selection. These high percentages that are distributed across the whole  
70 genome (Fig. 5) are reducing the ability to use this parameter as an effective  
71 method to detect candidate genes associated with domestication or improvement,  
72 in particular not as a stand-alone parameter. Lines 220-225 describe a candidate  
73 gene (Bhi10G001538) based on selection sweep in a 500 Kb region. The only  
74 other supportive information was the fact that this gene is highly expressed in fruit.  
75 This is very speculative and not clear why this example is provided as there is no

76 QTL reported in this interval, or differential expression analysis of this gene  
77 between large and small-fruited accessions.

78 Response:

79 Thanks for your comments. We have attempted to use several cutoffs (top 1%, 5%,  
80 10%) to detect the sweep regions. Using top 1% or 5% as cutoff, several QTL regions  
81 (*fw3.1*, *fd3.1* and *fd3.1*) related to fruit size in wax gourd were excluded, but they show  
82 obvious sweep signal (see Fig. 5b). Therefore, we selected the top 10% as the cutoff,  
83 as was done for maize<sup>1</sup> and pear<sup>2</sup>. To improve the identification efficiency of  
84 domestication and improvement sweeps, we further calculated the XP-CLR scores,  
85 and retained those with top 50% of XP-CLR scores, as with apple<sup>3</sup> and pear<sup>2</sup>  
86 (Response Table 1).

87 To provide more evidence for the candidate gene *Bhi10G001538*, we added RNA  
88 sequencing (RNA-seq) analysis between large- and small-fruited accessions. As  
89 expected, *Bhi10G001538*, encoding a small auxin-up-regulated RNA (SAUR), is  
90 significantly up-regulated in large-fruited accession, at three developmental stages,  
91 especially at 10 DAP compared to that in small-fruited accession (Fig. 5c). These data  
92 provide support for the hypothesis that *Bhi10G001538* contributes to fruit size.

93

94 Response Table 1. Summary of sweep regions in the wax gourd genome

|                           | Domestication | Improvement |
|---------------------------|---------------|-------------|
| Number of sweep regions   | 234           | 168         |
| Max sweep region          | 2,580 kb      | 2,440 kb    |
| Min sweep region          | 200 kb        | 200 kb      |
| Average sweep region      | 456 kb        | 475 kb      |
| Total sweep region length | 106.7 Mb      | 80.3 Mb     |
| Ratio of assembly genome  | 11.60%        | 9.10%       |
| Number of genes           | 3,939         | 2,251       |

95

96 6. Line 230: "cytological" should probably be replaced with histological.

97 Response:

98 Thanks for this suggestions. We used the word "histological" to replace "cytological"

99 in the revised manuscript.

100 7. Supplementary Fig. 13: I could not find information on the histological and the  
101 cell volume analyses. Should be added to the materials and methods.

102 Response:

103 We have the following to the Methods section of the revised manuscript:

104 To measure cell size in the wax gourd fruit of B227 and B214, 1-cm-thick sliced  
105 samples were cut from the outer, middle, and inner pericarp at different  
106 developmental time points, at 0, 5, 10, 15, 20 and 25 days after pollination (DAP).  
107 These sections were fixed in a solution of ethanol (70%), acetic acid, and  
108 formaldehyde (90:5:5 by volume) and then embedded into paraffin. Subsequently, 8  
109  $\mu\text{m}$ -thick-microtome sections were prepared (from cross- and longitudinal, stained  
110 with haematoxylin-eosi, and examined and images collected by light microscopy. Cell  
111 size in each section was calculated by ImageJ software; the top 30 cells in size were  
112 counted, and the mean and variance in cell size calculated, for each development  
113 period examined. Measurements were made at 3 different sites of each tissue, for 3  
114 sections from each fruit.

115 8. Fig. 4b: accession names bellow the graph are too small to read. Lines 232-233  
116 are referring to this figure with respect to accession B214 but I could not use this  
117 reference.

118 Response:

119 Accession names are listed in Supplementary table 2 according to the orders in Fig.  
120 4b. Accession B214 is highlighted in Fig. 4b.

121 9. QTL mapping (Lines 226-244): this part is based on previously published data.  
122 The authors refer to a previous QTL mapping study (Liu W, et al. Genetic analysis  
123 and QTL mapping of fruit-related traits in wax gourd (*Benincasa hispida*).  
124 *Euphytica* ) but a short sentence referring to the population used is lacking and  
125 essential (size, generation, etc...). Also a QTL table from this linkage population  
126 is not shown anywhere and should be added (as supplementary). In this part, QTL

127 fw3.1 is described and shown to be located within a domestication sweep interval,  
128 and a candidate gene (Bhi03G000723) is proposed based on annotated function.  
129 The authors also refer to the high expression in fruit of this gene but this is not  
130 reflected in Fig. 5f as the expression looks uniform also in leaf and root. In line  
131 243, "Fig. 6f" should be corrected to Fig. 5f. It is not mentioned whether this QTL  
132 also showed on the GWAS analysis. Taken together this is a speculative  
133 discussion on a candidate gene  
134 – the co-occurrence of QTL within domestication sweep interval is very probable  
135 to be random considering the high proportion of domestication sweep regions.

136 **Response:**

137 We used an F2 segregating population including 146 individuals which were derived  
138 from a cross between landrace accession B214, with fruit of ~2.0 Kg, and cultivated  
139 accession ‘B227’ with fruit of ~20 Kg. This information has been incorporated into  
140 our revised manuscript. The physical intervals of these QTLs have been presented in  
141 Supplementary data 8. For the candidate gene, *Bhi03G000723*, we identified five  
142 missense variant SNPs in its coding region. However, as mentioned by Reviewer 1,  
143 the level of analysis of this candidate gene is limited, and thus any conclusion as to  
144 function remains speculative. In view of this fact, we chose a new example  
145 candidate gene having more supportive evidence.

146 10. The authors can use syntenic analyses to identify and focus on candidate genes  
147 from other cucurbits. Specifically, there are several QTL studies on fruit size and  
148 shape QTLs in melon, including the mapping of candidate genes from other  
149 species (i.e. tomato). Alignment of QTLs in syntenic regions could add another  
150 layer to candidate genes identification.

151 **Response:**

152 In response to your suggestions, we collected the genes responsible for fruit size in  
153 tomato and other cucurbits. By aligning protein sequences of these genes against the  
154 genes within sweep and fruit size-related QTL regions in wax gourd, an orthologous

155 (*Bhi10G000196*) gene was identified. *Bhi10G000196* is located at the physical  
156 interval of the *fl10.1* QTL for fruit length and the domestication sweep from 5.2 Mb  
157 to 6.5 Mb. The mutation of its homologue *SIFIN* (*Solyc11g064850*) in tomato can  
158 cause enlarged fruit<sup>4</sup>. RNA-seq data showed that *Bhi10G000196* is down-regulated in  
159 the large-fruited accession, at three developmental stages (Response Fig. 2a),  
160 compared to that in small fruited-accession, supporting a role in enlarged fruit during  
161 wax gourd domestication. This gene, as a new candidate gene with more evidence,  
162 was added into the revised manuscript.

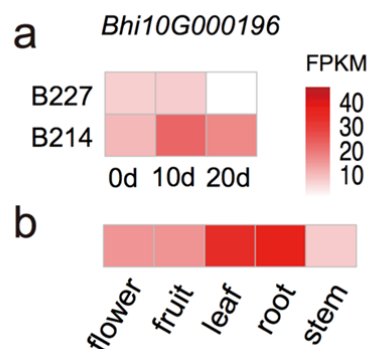

163  
164 Response Fig. 2 Expression profiles of a new candidate gene (*Bhi10G000196*)  
165 involved in wax gourd fruit size.

166  
167 11. GWAS is described in lines 245-253. Again, in this part, the co-localization of  
168 GWAS hits with domestication/improvement sweeps has high probability and  
169 could occur by chance alone. There is no description or definition of  
170 co-localization parameters (how is the confidence interval for GWAS hit defined?).  
171 The candidate gene mentioned in this part (*Bhi11G001327*) is also indicated  
172 within a QTL interval (based on Fig 5b but not in the text). Is that the case? it's not  
173 mentioned what is the QTL interval size and whether this gene indeed located  
174 within it?

175 Response:

176 The confidence intervals for our GWAS results are defined on the basis of p-values,

177 and this has been added in the revised manuscript.

178 The candidate gene *Bhi11G001327* is indeed within the interval of QTL fd11.1. To  
179 avoid undue speculation, in the revised manuscript, we provide only a list of genes  
180 with significant signals.

181 12. Fig. 5f show expression profile of three genes that are described as candidates for  
182 association with fruit size. The legend must be expanded for this figure: what is  
183 the scale, what is the reference expression used for the relative analysis. I could  
184 not find any description of this analysis anywhere (not in the legend or in the  
185 methods section. Which genotype was used? What expression analysis technique  
186 was used (RNA-Seq, qRT-PCR)? Number of reps? Statistics? etc...

187 Response:

188 We revised this figure and added detail information into the legend. Expression  
189 profiles for the candidate genes were generated by RNA-seq.

190 13. Analysis of differential expression of candidate genes between large and small  
191 fruited-accession is required to further support the claimed hypothesis on  
192 candidate genes.

193 Response:

194 As suggested, we have added the RNA-seq data of fruit at three (0, 10 and 20 DAP)  
195 developmental stages for large (B227) and small (B214) fruited accessions. DEGs  
196 between them were identified, using a false discovery rate (FDR) < 0.05 and fold  
197 change (FC) > 2 as cutoffs. In total, 1,642, 4,320 and 4,307 genes were identified as  
198 DEGs (Response Data 1-3) at 0, 10 and 20DAP, respectively (Response Fig. 1).  
199 *Bhi10G001538*, encoding a small auxin-up-regulated RNA (SAUR), and a new  
200 identified gene, *Bhi10G000196*, are supported by our differential expression analysis.

201 14. The discussion is very thin and should either be integrated with results or  
202 expanded.

203 Response:

204 As suggested, we have integrated the Discussion with the Results section.



205 15. Line 259: TE is used the first time as acronyms. Full term should be used.

206 [Response:](#)

207 [Full term for TE was used.](#)

208 16. Line 269: the verb "prefer" should probably be replaced with a passive verb that  
209 describe evolutionary advantage.

210 [Response:](#)

211 [We combined the Results and Discussion sections in the revised manuscript and this](#)  
212 [sentence was rephrased.](#)

213 17. In the variant calling description at the methods section it is not mentioned what  
214 minor allele frequency (MAF) was used as filtering criteria.

215 [Response:](#)

216 [Minor allele frequency \(MAF\) was more than 0.05 and has been indicated in the](#)  
217 [revised manuscript.](#)

218 18. In the GWAS description in the methods section (lines 407-413), three  
219 phenotyping seasons are mentioned but it is not clear how the data was used for  
220 association analysis. What was the correlation between seasons? Was the GWAS  
221 performed for each season separately? Were the same QTLs identified across  
222 seasons? or, was the data integrated and used for mapping?

223 [Response:](#)

224 [Correlations of fruit-related traits between different years are from 0.990 to 0.998](#)  
225 [\(Response Data 4\), indicating the high consistency across years. Therefore, the](#)  
226 [average values of fruit weight, length, diameter and fruit thickness were used in our](#)  
227 [GWAS. We also performed GWAS based on data of each season \(2014, 2015, 2016\),](#)  
228 [and similar results were obtained. The Methods section has been rewritten to clarify](#)  
229 [how these phenotypic data were assessed.](#)

230 19. The resequencing of diverse accession resulted in identification thousands of  
231 missense, nonsense and splice-sites mutations across the genome (lines 187-188). Was  
232 this information used to assess candidate genes in QTL intervals?

233 Response:

234 Yes, this information was used to assess candidate genes in sweeps and QTL intervals.  
235 For example, within the physical interval of the *fl10.1* QTL for fruit length, one  
236 domestication sweep from 5.20 to 6.56 Mb contained 55 genes. Among these genes,  
237 *Bhi10G000196* is a homologue of *SIFIN* (*Solyc11g064850*) in tomato, the mutation of  
238 which can cause enlarged tomato fruit<sup>4</sup>. Moreover, differential expression analysis  
239 supports its role in affecting fruit size. To provide further evidence, we examined the  
240 SNPs within the genic regions. A total of three missense variants and six synonymous  
241 variants were identified. These variants are only present in wild accessions, implying  
242 their selection during domestication. (Response data 5)

243

244

245

246 Reviewer #2 (Remarks to the Author):

247 The manuscript describes a draft genome assembly of wax gourd and genome  
248 variations derived from resequencing data of 146 wild, landrace and cultivated wax  
249 gourd accessions. Through comprehensive comparative and population genomic  
250 analyses, the authors concluded that the wax gourd genome represents the most  
251 ancestral karyotype of cucurbits, and they identified potential genome regions that  
252 have been affected during wax gourd domestication and improvement, as well as  
253 candidate genes contributing to large fruit size of wax gourd. The reported wax gourd  
254 draft genome provides a valuable resource for future comparative and evolutionary  
255 genomic studies, and the study provides certain insights into cucurbit genome  
256 evolution and wax gourd domestication.

257 Major:

258 1. The title is quite misleading and inaccurate. First, the genome does not bear a  
259 giant fruit. Second, the sequenced wax gourd genome is not an ancestral cucurbit

260 genome; it could have just retained the most ancestral cucurbit karyotype. This  
261 needs to be fixed throughout the entire manuscript.

262 Response:

263 Thanks for your insightful comments. The title has been revised to “The wax gourd  
264 genomes offer insights into the ancestral cucurbit karyotype and the genetic basis of  
265 diversity”. The revised manuscript has been written to reflect this situation.

266 2. Genome assembly: The authors need to provide the statistics of assembled contigs  
267 as well as the size of gapped regions.

268 Response:

269 We added this information in the revised manuscript (Supplementary Table 2 and 3).

270 3. Cucurbit ancestral genome reconstruction (Page 6-7 and Page 15): First, the  
271 method on ancestral genome reconstruction is poorly written (Line 369-373) and  
272 lacks sufficient details.

273 Response:

274 We added more detailed information on ancestral genome reconstruction in the  
275 Methods section on “Evolutionary scenario of cucurbit genomes”, as follows:

276 By comparing different cucurbit genomes, phylogenetically, we adopted a bottom-up  
277 approach to reconstruct the ancestral cell karyotypes of cucurbit plants. Firstly, by  
278 inferring putative homologous genes and collinear genes, we drew homologous gene  
279 dot plots within a genome and between genomes. Ks values were estimated to infer  
280 collinear genes produced by different events, and the information was integrated into  
281 the dot plots. Secondly, in that pumpkin is the outgroup of other studied cucurbits, we  
282 checked the dot plots to assess whether its chromosomes or main structures of its  
283 chromosomes, were shared by other cucurbit plants. Thirdly, the fusion and fission  
284 events during genome evolution of cucurbit species from their ancestral chromosomes  
285 were determined.

286 Then in the Results and Discussion we revised the section on ancestral chromosomes  
287 reconstruction. Actually, we found that, ignoring some intra-chromosome breakages

288 and inversions, seven wax gourd chromosomes, ., were shared with at least one of the  
289 other cucurbits, showing that they are most likely proto-chromosomes before the  
290 divergence of these cucurbits, ordinarily named proto-chromosomes 1-7. For an extra  
291 whole-genome duplication in pumpkin, if one copy of a duplicated chromosome is  
292 shared with other cucurbits, this would mean that it represents a proto-chromosome in  
293 the cucurbit common ancestor. We determined that wax gourd and pumpkin share six  
294 out of these 7 proto-chromosomes, suggesting the conserved nature of their genomes.  
295 Furthermore, for the wax gourd chromosomes, Bhi2, Bhi3, and Bhi10, both  
296 homoeologous copies produced by the cucurbit-common whole-genome duplication  
297 was preserved in pumpkin (Cma), showing that they could represent  
298 proto-chromosomes before the event.

299 Large patches of chromosome segments shared by extant genomes can be used to  
300 infer  
301 other proto-chromosomes. Some of these large patches lack linked co-existence with  
302 other chromosomes or chromosome regions. For example, wax gourd chromosome  
303 Bhi 9 could be found to occur in partite manner in other genomes, and each part is  
304 independent of the other one, and at the mean time independent of other  
305 chromosomes; this shows their independence in the ancestral genome, and leads to the  
306 definition of proto-chromosomes 8 and 9. Similarly, we inferred proto-chromosomes  
307 11, 12, 14, and 15. Some large patches have linked co-existence in extant genomes,  
308 showing that they could have originated from the same proto-chromosome. For  
309 example, one patch in Bhi 1 and another in Bhi 11 co-occurs in four genomes,  
310 especially two times in Cma, showing that they should be from the same  
311 proto-chromosome, even one being prior to the cucurbit-common whole-genome  
312 duplication; this leads to the inference of proto-chromosome 13. Similarly, we  
313 inferred proto-chromosome 10.

314 Second, the ancestral genome of cucurbits the authors reconstructed has 15  
315 protochromosomes, which is different from the number of protochromosomes (12)

316 described in Wu et al. (<https://onlinelibrary.wiley.com/doi/full/10.1111/tpj.13722>).

317 The authors need to provide an explanation of this inconsistency.

318 Response:

319 Wu et al. took 12 melon chromosomes as cucurbit-common proto-chromosomes.

320 Actually, we can easily infer that several melon chromosomes cannot represent

321 ancestral chromosomes. For example, melon chromosome 1 (Cme1) corresponds two

322 or more chromosomes in the other four genomes [Bhi (Bhi5, Bhi9), Lsi (Lsi2, Lsi3),

323 Cla (Cla2, Cla9), Cma (Cma17, Cma19; and Cma8, Cma11)] (Response Fig. 3). The

324 finding that Cme1 preserves its main structure in cucumber chromosome 7 (Csa7) can

325 be easily explained by a merge in their latest common ancestor. The other Cme

326 chromosomes 5, 7, and 11 can also be inferred to be formed in its own lineage, or its

327 close lineages.

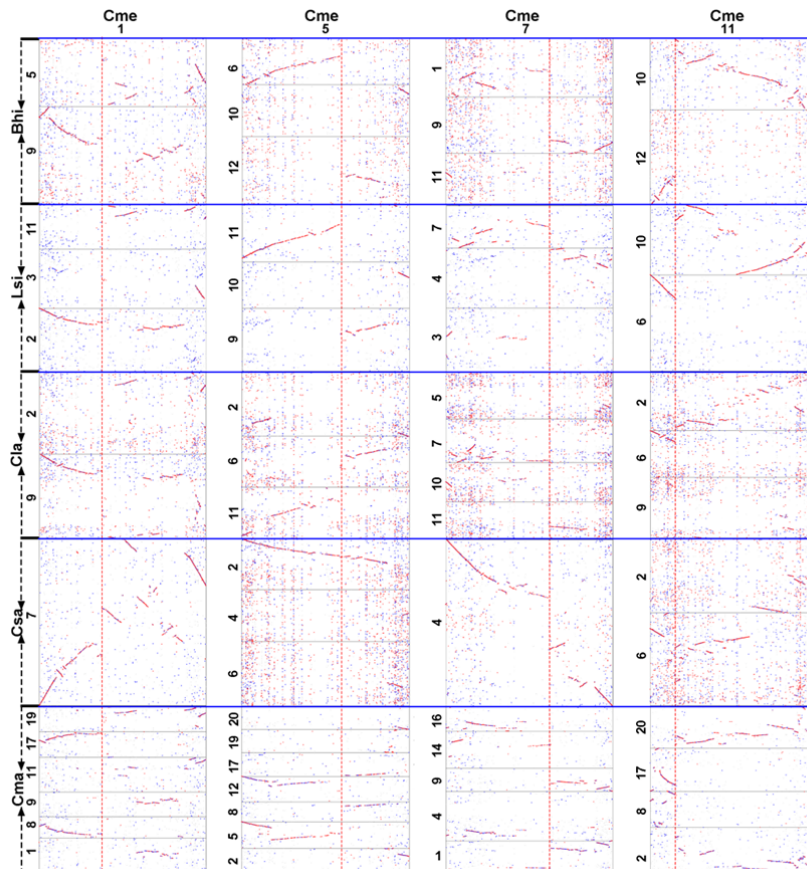

328

329 Response Fig. 3 Dotplot of the melon genome (Cme) compared to other cucurbits  
330 genomes.

331

332 Third, as indicated in their title of the manuscript, the authors were trying to  
333 emphasizing the significance of the wax gourd genome as an ancestral cucurbit  
334 genome. As I mentioned above, this is not correct. In addition, the significance  
335 that the wax gourd genome has retained the most ancestral cucurbit karyotype  
336 seems marginal.

337 Response:

338 We have rephrased the related content. The wax gourd genome has preserved the  
339 main structure of 7 proto-chromosomes, and other large patches, thus contributing to  
340 our understanding of the ancestral karyotype, demonstrating its conservativeness over  
341 other sequenced cucurbit genomes.

342

343 4. The “Discussion” section is very poorly written. The second paragraph of the  
344 Discussion is poorly developed. The hypothesis that cucurbit species with 12  
345 chromosomes tend to retain the ancestral karyotype seems too speculative. In  
346 addition, there is no discussion at all related to the second part of the manuscript  
347 (genome variation, domestication and fruit size).

348 Response:

349 We have integrated the Results and Discussion sections in the revised manuscript. In  
350 addition, we have included more information related to genome variation and  
351 domestication.

352 5. Line 430-439: the authors identified domestication and improvement sweeps by  
353 scanning genomic regions with top 10% nucleotide diversity ratio. The threshold  
354 of top 10% seems to be very high - other similar studies generally use much more  
355 stringent thresholds. They should also use model-based approaches, such as

356 XP-CLR or similar methods. With the current method and parameter, the  
357 identified sweeps would contain quite a lot of false positives.

358 Response:

359 Thanks for your comments. This question was similar to the fifth question raised by  
360 Reviewer #1. We employed several cutoffs (top 1%, 5%, 10%) to detect the sweep  
361 regions. Using the top 1% or 5% as cutoff, several QTL regions (*fw3.1*, *fd3.1* and *ft3.1*)  
362 related to fruit size in the wax gourd were excluded, but they show obvious sweep  
363 signal (see Fig. 5b). Based on this finding, we selected the top 10% as the cutoff, as  
364 with maize<sup>1</sup> and pear<sup>2</sup>. To improve the identification efficiency of domestication and  
365 improvement sweeps, we further calculated the XP-CLR scores, and retained those  
366 with top 50% of XP-CLR scores, as in apple<sup>3</sup> and pear<sup>2</sup> (Response Table 1).

367 Minor:

368 6. Line 264-265, Population structure analysis shows that B214 is an admixture of  
369 wild, landrace and cultivated wax gourds (Fig. 4b): I could not see this from Fig.  
370 4b.

371 Response:

372 B214 is highlighted in the revised manuscript.

373 7. Line 280, GWAS threshold of  $-\log_{10}(P)=6$ : how this cutoff was derived? How  
374 many SNPs were used for GWAS?

375 Response:

376 A total of 2,237,614 SNPs (MAF > 5% and Missing rate < 10%) for 146 accessions  
377 was used to perform the GWAS, and a threshold of  $-\log_{10}(P)=6$  was set using N (the  
378 effective number of independent SNPs,  $P=1/N$ ). The effective number of independent  
379 SNPs was calculated using Genetic type 1 Error Calculator (GEC) software<sup>5</sup>. This  
380 information has been included in the revised manuscript.

381 8. Line 352-353: which known divergence time(s) (between which species) in the  
382 tree was used to infer the divergence times?

383 Response:

384 Divergence times were estimated by the program MCMCtree in PAML (version 3.15)  
385 (<http://abacus.gene.ucl.ac.uk/software/paml.html> ), based on known divergence time  
386 between cucumber and melon (about 10 MYA)<sup>6</sup>. This information was added to the  
387 revised manuscript.

388 9. Fig. 1 and Fig. 2 legends: please add the meanings of sWGD, CCT, ECH...

389 Response:

390 The abbreviations sWGD, CCT and ECH are specific whole genome duplication,  
391 cucurbit-common tetraploidization, and eudicot-common hexaploidization,  
392 respectively. This information was added in the revised manuscript.

393 10. Non-wax group and wax group could be compared to identify some interesting  
394 genome regions that may underlie the phenotypic difference.

395 Response:

396 Population fixation index (FST) between Cultivar2 (non-wax) and Cultivar1 (wax)  
397 group was calculated using HIERFSTAT<sup>7</sup> R package, base on the high confidence  
398 filtered SNPs (1,855,619), including 10,322 nonsynonymous SNPs. Highly  
399 differentiated regions of two Cultivar groups were identified, using 200 kb sliding  
400 windows with a step size of 20 kb with the top 5% of FST values. We detected 183  
401 highly differentiated regions ranging from 200 kb to 2,280 kb in length (465 kb on  
402 average) (Response Data 6) including 2750 genes. In cucumber, two major QTL,  
403 *WP5.1* and *WP6.2* related to wax, were detected<sup>8</sup> (Response Data 7), but no QTL was  
404 defined in the wax gourd. We obtained a homolog set, including 301 genes, which are  
405 located in QTL *WP5.1* and *WP6.2*, based on synteny analyses between cucumber  
406 and wax gourd. Only 11 genes overlapped between the homolog set and genes in  
407 differentiated regions (Response Data 8). In the absence of additional supportive  
408 evidence, we do not present these results in the revised manuscript.

409

410 Reviewer #3 (Remarks to the Author):



411 The article submitted to Nature Communications (manuscript number  
412 NCOMMS-19-00378) entitled ‘The sequence and variation of an ancestral cucurbit  
413 genome bearing giant fruit’, by Dasen Xie and collaborators delivers the genome  
414 sequence of wax gourd and investigates the evolution of the cucurbit genomes, the  
415 dynamics of repeated elements, the genomic footprint of domestication and  
416 improvement as well as delivers candidate genes driving fruit traits. While the article  
417 delivers a high quality reference sequence of the wax gourd genome, several major  
418 concerns and associated opened questions are addressed below:

419

420 Major concerns

421 Section ‘Identification of the cucurbit ancestral genome’:

422 -What calibration strategy/system has been used to infer speciation datation events in  
423 MYA from the 463 single-copy gene family?

424 [Response:](#)

425 [This question is similar to the eighth question raised by Reviewer #2](#)

426 [Divergence times were estimated by the program MCMCtree in PAML \(version 3.15\)](#)  
427  [\(http://abacus.gene.ucl.ac.uk/software/paml.html \)](http://abacus.gene.ucl.ac.uk/software/paml.html), based on the known divergence  
428 [time between cucumber and melon \(about 10 MYA\)<sup>6</sup>.](#)

429 -Methods and tools for genome alignment, synteny inference and ancestral genome  
430 reconstruction are very sensitive to parameters and thresholds. The author should  
431 detail the (maybe arbitrary) parameters used in each steps, if any and possible  
432 impacts.

433 -What is mentioned in the method section as ‘using the most ancestral genome as  
434 reference the ancestral chromosome were inferred’ may seem too vague for readers to  
435 be able to reproduce the analysis.

436 - What can be the impact of using wax gourd as reference genome in defining  
437 ancestral karyotype that at the end appears similar to wax gourd? At least this point  
438 has to be mentioned that wax gourd was considered as reference genome. Methods

439 and tools and associated parameters are now available to reconstruct ancestral  
440 genomes and infer evolutionary scenario without any assumption of considering  
441 extant genomes as reference.

442 -In the text and associated supplementary figures mainly pumpkin/wax gourd/melon  
443 and pumpkin/wax gourd/melon comparisons have been considered. How the other  
444 pairwise comparisons have been integrated and exploited in the synteny  
445 identification?

446 **Response:**

447 We added more detailed information on ancestral genome reconstruction in the  
448 Methods section on “Evolutionary scenario of cucurbit genomes”, as follows:

449 By comparing different cucurbit genomes, phylogenetically, we adopted a bottom-up  
450 approach to reconstruct the ancestral cell karyotypes of cucurbit plants. Firstly, by  
451 inferring putative homologous genes and collinear genes, we drew homologous gene  
452 dot plots within a genome and between genomes. Ks values were estimated to infer  
453 collinear genes produced by different events, and the information was integrated into  
454 the dot plots. Secondly, in that pumpkin is the outgroup of other studied cucurbits, we  
455 checked the dot plots to assess whether its chromosomes or main structures of its  
456 chromosomes, were shared by other cucurbit plants. Thirdly, the fusion and fission  
457 events during genome evolution of cucurbit species from their ancestral chromosomes  
458 were determined.

459 Then in the Results and Discussion we revised the section on ancestral chromosomes  
460 reconstruction. Actually, we found that, ignoring some intra-chromosome breakages  
461 and inversions, seven wax gourd chromosomes, ., were shared with at least one of the  
462 other cucurbits, showing that they are most likely proto-chromosomes before the  
463 divergence of these cucurbits, ordinally named proto-chromosomes 1-7. For an extra  
464 whole-genome duplication in pumpkin, if one copy of a duplicated chromosome is  
465 shared with other cucurbits, this would mean that it represents a proto-chromosome in  
466 the cucurbit common ancestor. We determined that wax gourd and pumpkin share six

467 out of these 7 proto-chromosomes, suggesting the conserved nature of their genomes.  
468 Furthermore, for the wax gourd chromosomes, Bhi2, Bhi3, and Bhi10, both  
469 homoeologous copies produced by the cucurbit-common whole-genome duplication  
470 was preserved in pumpkin (Cma), showing that they could represent  
471 proto-chromosomes before the event.

472 Large patches of chromosome segments shared by extant genomes can be used to  
473 infer

474 other proto-chromosomes. Some of these large patches lack linked co-existence with  
475 other chromosomes or chromosome regions. For example, wax gourd chromosome  
476 Bhi 9 could be found to occur in partite manner in other genomes, and each part is  
477 independent of the other one, and at the mean time independent of other  
478 chromosomes; this shows their independence in the ancestral genome, and leads to the  
479 definition of proto-chromosomes 8 and 9. Similarly, we inferred proto-chromosomes  
480 11, 12, 14, and 15. Some large patches have linked co-existence in extant genomes,  
481 showing that they could have originated from the same proto-chromosome. For  
482 example, one patch in Bhi 1 and another in Bhi 11 co-occurs in four genomes,  
483 especially two times in Cma, showing that they should be from the same  
484 proto-chromosome, even one being prior to the cucurbit-common whole-genome  
485 duplication; this leads to the inference of proto-chromosome 13. Similarly, we  
486 inferred proto-chromosome 10.

487 Section ‘Genomic variation and population structure’:

488 -Selective sweeps have been investigated using  $\pi$  and Tajima D. How and why the  
489 authors selected such metrics among several population genetics methods available to  
490 date (Fst, ROD, XP-CLR...among many other approaches) to investigate signatures  
491 of domestication and breeding? What are the impact of using  $\pi$  and Tajima D in  
492 defining selective sweeps compared to the other approaches?

493 Response:

494 We have attempted to use several population genetic methods such as ROD, Tajima D,

495 XP-CLR to investigate signatures of domestication and improvement. About 74.5%  
496 regions overlapped between the results from different methods, using the same cutoff.  
497 To improve the accuracy, we first define the regions with the top 10% reduction of  
498 nucleotide diversity, and then excluded those without top 50% of XP-CLR scores, as  
499 in apple<sup>3</sup> (Response Table 1).

500 Section 'Candidate genes conferring fruit traits':

501 -How the candidate genes are selected among the GWAS/QTL intervals and  
502 associated improvement/domestication sweeps? Several candidates may probably  
503 pass the considered criteria, why and how a single candidate is then  
504 presented/selected? How the interval boundaries are defined? How many annotated  
505 genes in the intervals? How many gene with selection footprints? How a single gene  
506 is finally selected as candidate? Any functional validation (using publicly available  
507 resources among the Cucurbitaceae) have been conducted to propose the delivered  
508 candidate genes?

509 Response:

510 To facilitate the identification of candidate genes responsible for fruit size, we  
511 generated RNA-seq data for fruit at three (0, 10 and 20 DAP) developmental stages,  
512 for the large (B227) and small (B214) fruited accessions. Differentially expressed  
513 genes were then used to identify potential candidate genes for fruit size during  
514 domestication and improvement.

515 In addition, we collected the genes responsible for fruit size in tomato and other  
516 cucurbits. By aligning protein sequences of these genes against the genes within  
517 sweep and fruit-size related QTL regions, in wax gourd, one orthologous  
518 (*Bhi10G0001968*) gene was identified. In addition, a gene with more supporting  
519 evidence for a role in fruit enlargement was included in the revised manuscript.

520 Minor concerns

521 The authors should make sure that all the data are provided as supplementary datasets;

522 -OrthoMCl gene families.

523 -List of orthologous and paralogous genes.  
524 -List of genes with domestication and improvement sweeps.  
525 -List of GWAS and QTL regions and associated annotated genes.  
526 Among many others, so that that "skilled in the art" can reproduce the results and can  
527 integrate the delivered data in complementary analyses.

528 [Response:](#)

529 [We have now provided all the data in our revised manuscript.](#)

### 530 **References**

- 531 1. Hufford MB, *et al.* Comparative population genomics of maize domestication and  
532 improvement. *Nat Genet* **44**, 808-811 (2012).
- 533 2. Wu J, *et al.* Diversification and independent domestication of Asian and European  
534 pears. *Genome Biol* **19**, 77 (2018).
- 535 3. Duan N, *et al.* Genome re-sequencing reveals the history of apple and supports a  
536 two-stage model for fruit enlargement. *Nat Commun* **8**, 249 (2017).
- 537 4. Xu C, *et al.* A cascade of arabinosyltransferases controls shoot meristem size in  
538 tomato. *Nature genetics* **47**, 784 (2015).
- 539 5. Li MX, Yeung JM, Cherny SS, Sham PC. Evaluating the effective numbers of  
540 independent tests and significant p-value thresholds in commercial genotyping  
541 arrays and public imputation reference datasets. *Hum Genet* **131**, 747-756 (2012).
- 542 6. Sebastian P, Schaefer H, Telford IR, Renner SS. Cucumber (*Cucumis sativus*) and  
543 melon (*C. melo*) have numerous wild relatives in Asia and Australia, and the sister  
544 species of melon is from Australia. *Proc Natl Acad Sci U S A* **107**, 14269-14273  
545 (2010).
- 546 7. de Meeus T, Goudet J. A step-by-step tutorial to use HierFstat to analyse  
547 populations hierarchically structured at multiple levels. *Infect Genet Evol* **7**,  
548 731-735 (2007).
- 549 8. Tian Gui li ZSp, Song Zi chao, Zhang Song, Cui Jin ying, Miao Han, Gu Xing  
550 fang. Genetic Analysis and QTL Mapping of Wax Powder on the Surface of  
551 Cucumber Fruit. *Scientia Agricultura Sinica* **48**, 3666 (2015).

552

553

554

555

556

557

558

559

560

561 Second round of review

562 Reviewers' comments:

563 Reviewer #1 (Remarks to the Author):

564 Relatively limited further experimental data was provided to the current version of the  
565 manuscript with respect to the candidate genes classification, prioritization or  
566 validation (differential gene expression data between the parental lines on developing  
567 fruits was added). This part of the manuscript was adjusted and slightly improved and  
568 is now more coherent and focused. While it now better reflecting the message that the  
569 combined approaches of genetic mapping and selection signature regions detection  
570 can be informative to detect candidate domestication genes, none of the candidates  
571 presented pass beyond this level of hypothesis.

572

573 Specific comments:

574 1. Lines 302-309: *Bhi10G001538* gene is candidate only based its localization within  
575 a domestication sweep region and on differential expression between two large and  
576 small-fruited accessions. This, in my view, is still very weak and speculative. In  
577 addition, it seems that a fruit size QTL was not mapped in this interval, which further  
578 weakens this hypothesis.

579 **Response:**

580 Thanks for your comments. To provide more evidence for the candidate gene  
581 *Bhi10G001538*, we analyzed its ortholog (*Csa2G258100*) in cucumber. It was found  
582 that *Csa2G258100* was mapped in the QTL interval *fd2.1* for fruit diameter<sup>1</sup>.  
583 RNA-seq data of two near isogenic cucumber lines bearing different fruit in length  
584 show that this gene is significantly up-regulated in long-fruited line<sup>2</sup> (Response Fig.  
585 1), which is consistent with its role in wax gourd.

586 In addition, to test the function of SAUR(*Bhi10G001538*) gene in cell expansion in  
587 wax gourd, we transiently expressed *35S-MYC-SAUR* and a vector control in  
588 cotyledons of wax gourd by agroinfiltration. The expression of MYC-SAUR protein  
589 was detected by immunoblotting using anti-MYC antibodies when infiltrated with

590 OD<sub>600</sub> at 0.9 (Response Fig. 2a). We further investigated the effects of expression of  
591 SAUR protein on the cell size of epidermal pavement cells at 5 days post infiltration.  
592 The results revealed that the cell size was significantly larger in cotyledon expressing  
593 MYC-SAUR (Response Fig. 2b and 1c). These results provide further evidence that  
594 the SAUR gene plays an important role in cell expansion and plant organ size.  
595 For wax gourd, we have not developed a high-efficiency transformation system. Thus,  
596 presently, it is not possible to validate the function of this gene using transformation  
597 system. In a future project, we plan to validate these genes for wax gourd. In this  
598 manuscript, we focus on the novel insights into the ancestral cucurbit karyotype and  
599 the genetic basis of wax gourds' diversity through our analyses of these genome data.  
600 These new findings have been incorporated into the revised manuscript.

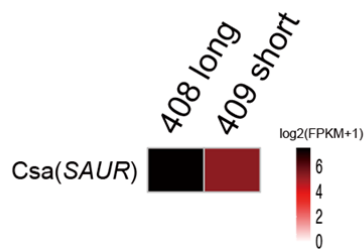

601  
602 Response Fig. 1 Differential expression of SAUR gene in two near isogenic cucumber  
603 lines.



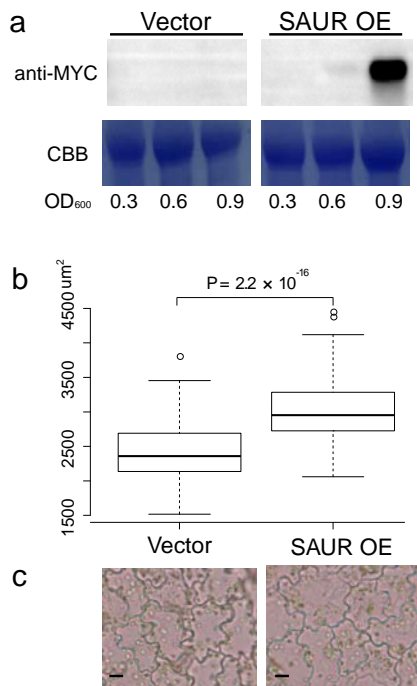

604

605 Response Fig. 2 Transient expression of *Bhi10G001538*. **a** Expression profiles of  
 606 *Bhi10G001538* protein using OD<sub>600</sub> at 0.3, 0.6 and 0.9, Coomassie brilliant blue (CBB)  
 607 staining (lower panel) shown as a loading control. **b-c** Boxplots and morphology  
 608 indicating epidermal pavement cell size of wax gourd cotyledon with *Bhi10G001538*  
 609 overexpression and empty vector. (OE: overexpression) Bar = 50 µm.

610

611 2. Lines 321-366: the gene SIFIN (solyc11g064850) is presented as a candidate. I  
 612 Couldn't find it at the provided reference (#27). Also, on line 365 it is stated that it is  
 613 highly expressed in the fruit (Figure S14). This is not completely correct. The highest  
 614 expression of this gene according to figure S14 is in the leaf and root.

615 Response:

616 We apologize for the error in the reference which, unfortunately, was mis-linked by  
 617 endnote automatically. This error has been corrected in the revised manuscript. *SIFIN*  
 618 (*Solyc11g064850*) is expressed in different tissues and at different stages in tomato<sup>3</sup>.  
 619 We also investigated the *SIFIN* ortholog in other cucurbit species, such as cucumber  
 620 and melon. In cucumber, the highest expression of *FIN* is in the leaf<sup>4</sup> and for melon it

621 is in root<sup>5</sup>. But *FIN* is highly expressed in the fruit in all three cucurbit species  
 622 (Response Fig. 3). *BhiFIN* (*Bhi10G000196*) is significantly down-regulated in the  
 623 large-fruited accession (Fig. 5c). In addition, *CsaFIN* is down-regulated in the  
 624 long-fruited accession of two cucumber near isogenic lines with different fruit  
 625 lengths<sup>2</sup> (Response Fig. 4). To avoid any misunderstanding, we deleted the  
 626 Supplementary Figure 14. These data also support the sated role of this candidate  
 627 gene.

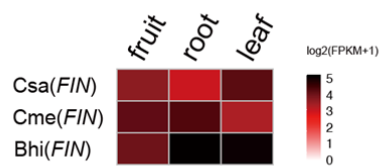

628  
 629 Response Fig. 3. Expression profiles of *FIN* genes in three tissues in three species.

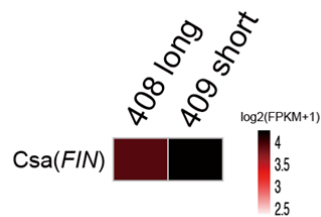

631  
 632 Response Fig. 4. Differential expression of *FIN* gene in two near isogenic cucumber  
 633 lines.  
 634

635 3. In figure 5c, labels for the developmental stage is required below each column.

636 Response

637 Thanks for the suggestion. We added labels for Figure 5c in the revised manuscript.

638

639 Reviewer #2 (Remarks to the Author):

640 The authors have addressed most of my concerns. I still have one major concern left:

641 In their response, the authors stated that same as in maize and pear studies, genome  
 642 regions with top 10% nucleotide diversity ratio were selected as selective sweeps in

643 their original manuscript. I checked the two related papers (Hufford et al. and Wu et  
644 al.) and found it is not as described by the authors. The maize one used top 10%  
645 XP-CLR score combined with top 50% of reduction in nucleotide diversity and the  
646 pear one used top 5% of FST,  $ROD > 0.5$ , and bottom 10% of Tajima's D  
647 distribution.

648

649 In the revised manuscript, the authors use top 10% nucleotide diversity ratio  
650 combined with top 50% of XP-CLR score. The authors stated that same criteria was  
651 used in the apple study. Again, I checked the apple paper (Duan et al.) and found they  
652 used top 10% XP-CLR score combined with top 50% nucleotide diversity ratio, same  
653 as the maize one but different from what authors used here for wax gourd. Selective  
654 sweeps identified by the authors with the new parameters still occupied a high portion  
655 of the genome and could contain quite a lot of false positives. A more stringent  
656 criteria is recommended, or use top 10% XP-CLR score combined with top 50%  
657 nucleotide diversity ratio, same the one used for maize and apple studies.

658 [Response:](#)

659 [Thanks for the comments. Actually, we identified the sweep regions using both](#)  
660 [criteria: \(1\) top 10% nucleotide diversity ratio combined with top 50% XP-CLR score](#)  
661 [\(denoted hereafter as criteria 1\) \(Response Table1\); \(2\) top 10% XP-CLR score](#)  
662 [combined with top 50% nucleotide diversity ratio \(denoted hereafter as criteria 2\)](#)  
663 [\(Response Table2\). Comparing the two results we show that they share more than](#)  
664 [79.0% \(84.3 Mb\) domestication and 77.3% \(62.1 Mb\) improvement regions. All nine](#)  
665 [mapped QTL intervals for fruit size overlap with the sweeps, of which the major QTL](#)  
666 [fw3.1, on chromosome 3, shows a strong sweep signal using criteria 1, but weak](#)  
667 [using criteria 2. Therefore, we selected using criteria 1.](#)

668 [Response Table1. Summary of sweep regions in the wax gourd genome with criteria](#)  
669 [1.](#)

---

| Domestication | Improvement |
|---------------|-------------|
|---------------|-------------|

---

|                                |       |       |
|--------------------------------|-------|-------|
| Number of sweep regions        | 234   | 168   |
| Max sweep region (Kb)          | 2,580 | 2,440 |
| Min sweep region (Kb)          | 200   | 200   |
| Average sweep region (Kb)      | 456   | 475   |
| Total sweep region length (Mb) | 106.7 | 80.3  |
| Ratio of the assembly (%)      | 11.60 | 9.10  |
| Number of genes                | 3,939 | 2,251 |

670

671 Response Table2. Summary of sweep regions in the wax gourd genome with criteria

672 2.

|                                | Domestication | Improvement |
|--------------------------------|---------------|-------------|
| Number of sweep regions        | 227           | 153         |
| Max sweep region (Kb)          | 2,360         | 2,500       |
| Min sweep region (Kb)          | 200           | 200         |
| Average sweep region (Kb)      | 476           | 490         |
| Total sweep region length (Mb) | 108.1         | 75.1        |
| Ratio of the assembly (%)      | 11.84         | 8.23        |
| Number of genes                | 3,953         | 2,127       |

673

674

675 Reviewer #3 (Remarks to the Author):

676 The article submitted to Nature Communications (manuscript number

677 NCOMMS-19-00378) entitled ‘The wax gourd genomes offer insights into the

678 ancestral cucurbit karyotype and the genetic basis of diversity’, by Dasen Xie and

679 collaborators delivers the genome sequence of wax gourd and investigates the

680 evolution of the cucurbit genomes, the dynamics of repeated elements, the genomic

681 footprint of domestication and improvement as well as delivers candidate genes

682 driving fruit traits. The article has been revised based on previous concerns and

683 recommendations. Whereas additional analyses performed by the authors respond to

684 previous concerns, please find below additional comments that may improve the

685 current manuscript:

686

687 Lines 26-28 page 3: The sentence ‘Comparing the genomes of cucumber, melon,

688 watermelon, and bottle gourd revealed that the 12 chromosomes of melon probably

689 represent the ancestral karyotype of the cucurbit species' could be changed into  
690 'comparing a few available genomes at that time for cucumber, melon, watermelon  
691 and bottle gourd previously proposed that the 12 chromosomes of melon may  
692 represent the ancestral karyotype of the cucurbit species' (to address that the  
693 resolution was not the same in term of comparative genomics in previous analyses).

694 [Response:](#)

695 [Thanks you for your suggestions. We changed the sentence as suggested.](#)

696

697 Lines 109-114 page 5: Supplementary Figure 6 proposes a ECH-based re-calibration  
698 of the Ks peaks for speciation and duplication. 16.3, 18.1, 26.4 and 36.1 MYA  
699 mentioned in the text refer to the uncalibrated or recalibrated values? Why in the  
700 Figure 1b the 2 peaks (CCT and ECH) seems both re-calibrated, when, as far as I  
701 understand, either it is possible to re-calibrate (the speciation date and associated KS  
702 values) with ECH (and then CCT is not calibrated) OR CCT (and then ECH is not  
703 calibrated). CCT and ECH cannot be re-calibrated on the same KS plot as they will  
704 derive different correction rates?

705 [Response:](#)

706 [Thank you for your comments. Firstly, the time nodes \(16.3, 18.1, 26.4 and 36.1](#)  
707 [MYA\) mentioned in the main text are recalibrated values after the corrections.](#)  
708 [Secondly, considering that the cucurbits underwent an extra specific polyploidization](#)  
709 [\(CCT\) after ECH, we performed a further round correction, at the CCT event, based](#)  
710 [on the first correction in ECH, and displayed both the ECH and CCT on the same](#)  
711 [Figure 1b.](#)

712

713 Lines 114-119 page 5: The sentence 'In wax gourd, 32 gene families comprising 324  
714 genes exhibited significant expansions ( $p < 0.01$ ) relative to their ancestor  
715 (Supplementary Data 1). Some of these families were annotated as cytochrome b-c1  
716 complex subunit, zinc finger protein and NBS-LRR resistance genes (Supplementary  
717 Table 6, Supplementary Fig. 5). These genes may be associated with the specific

718 features of wax gourd' seems too vague and would need precision (for example  
719 providing the GO for the (10) most expanded families instead of some (arbitrary)).

720 **Response:**

721 **We rephrased this sentence to read: "These genes might be a resource for  
722 investigating the specific features of wax gourd".**

723 Lines 150-153 page 6: The sentence 'The 12 melon chromosomes were previously  
724 considered the most ancestral karyotype in the cucurbits<sup>4</sup>; however, only five melon  
725 chromosomes (chromosomes 2, 8, 9, 10, and 12) were well preserved in the pumpkin  
726 genome (Supplementary Fig. 7)' could be changed into: 'The 12 melon chromosomes  
727 were previously proposed as the most ancestral karyotype from few cucurbit genomes  
728 available at that time; however, only five melon chromosomes (chromosomes 2, 8, 9,  
729 10, and 12) appear to be well preserved in the pumpkin genome (Supplementary Fig.  
730 7)' (to address that the resolution was not the same in term of comparative genomics  
731 in previous analyses)

732 **Response:**

733 **Thanks you for your suggestions. We changed the sentence as suggested.**

734 Lines 163-186 page 7: This section can be simplified (shorten by half) in three  
735 subsections (of the same paragraph):

736 (1) Entire wax gourd chromosomes preserved in several cucurbit genomes (with  
737 melon for Bhi 2, 3, 4, 5, 7, 8, 10 and pumpkin for Bhi2, Bhi3, and Bhi10) defining  
738 proto-chromosomes 1-7;

739 (2) Large patches of wax gourd chromosomes independent in several extant genomes  
740 (defining proto-chromosomes 8, 9);

741 (3) large patches of different wax gourd chromosomes linked in several extant  
742 genomes (defining protochromosomes 10 and 13);

743 **Response:**

744 **We shortened these sentences as suggested.**

745 Lines 199-202 page 8: the sentence ‘After wax gourd, the melon genome best  
746 preserved the ancestral karyotype of cucurbits, with seven melon chromosomes  
747 (chromosomes 2, 3, 6, 8, 9, 10, and 12) derived directly from the ancestral ones’ could  
748 be changed into ‘After wax gourd, the melon genome best preserved the ancestral  
749 karyotype of cucurbits as previously reported<sup>4</sup>, with seven melon chromosomes  
750 (chromosomes 2, 3, 6, 8, 9, 10, and 12) derived directly from the ancestral ones’ (for  
751 consistency with the introduction)

752 [Response:](#)

753 [We changed the sentence as suggested.](#)

754

755 Regarding the section devoted to ‘Genomic variation and population structure’, the  
756 authors addressed the previous concerns in running and comparing several population  
757 genetics methods (with 47.5% of consistency) to investigate signatures of  
758 domestication and breeding.

759 Regarding the section devoted to ‘Candidate genes conferring fruit traits’ the authors  
760 conducted RNA-seq experiments (as well as synteny inference with melon genes as  
761 suggested by one of the reviewer) to provide ‘functional’ support to the reported  
762 candidate genes.

763 [Response:](#)

764 [Thanks you for your comments.](#)

765

766

767

## 768 **References**

- 769 1. Pan, Y. et al. QTL mapping of domestication and diversifying selection related  
770 traits in round-fruited semi-wild Xishuangbanna cucumber (*Cucumis sativus* L.  
771 var. *xishuangbannanensis*). *Theoretical and Applied Genetics* **130**, 1531-1548  
772 (2017).
- 773 2. Jiang, L. et al. Transcriptomic analysis reveals the roles of microtubule-related  
774 genes and transcription factors in fruit length regulation in cucumber  
775 (*Cucumis sativus* L.). *Sci Rep* **5**, 8031 (2015).

- 776 3. Shinozaki, Y. et al. High-resolution spatiotemporal transcriptome mapping of  
777 tomato fruit development and ripening. *Nat Commun* **9**, 364 (2018).
- 778 4. Li, Z. et al. RNA-Seq improves annotation of protein-coding genes in the  
779 cucumber genome. *BMC Genomics* **12**, 540 (2011).
- 780 5. Yano, R., Nonaka, S. & Ezura, H. Melonet-DB, a Grand RNA-Seq Gene  
781 Expression Atlas in Melon (*Cucumis melo* L.). *Plant Cell Physiol* **59**, e4  
782 (2018).
- 783
- 784
- 785
- 786
- 787
- 788
- 789
- 790



791 Third round of review

792 Reviewers' comments:

793 Reviewer #1 (Remarks to the Author):

794 The relevant comments were addressed. no further comments.

795

796 Reviewer #2 (Remarks to the Author):

797 The authors have addressed my concerns.

798

799 Reviewer #3 (Remarks to the Author):

800 The article submitted to Nature Communications (manuscript number

801 NCOMMS-19-00378B) entitled ‘The wax gourd genomes offer insights into the

802 ancestral cucurbit karyotype and the genetic basis of diversity’, by Dasen Xie and

803 collaborators delivers the genome sequence of wax gourd and investigates the

804 evolution of the cucurbit genomes, the dynamics of repeated elements, the genomic

805 footprint of domestication and improvement as well as delivers candidate genes

806 driving fruit traits.

807

808 The article has been revised based on previous concerns and recommendations (sun).

809 Whereas additional recommended analyses have not been performed, the text

810 modification have been included in the current version of the manuscript, as detailed

811 below:

812

813 Lines 26-28 page 3: Text corrections have been done.

814

815 Lines 109-114 page 5: The recommendation have been taken into consideration with

816 the Figure 1b displaying both ECH and CCT recalibration.

817

818 Lines 114-119 page 5: No additional analysis have been performed (for example

819 providing the GO for the 10 most expanded families instead of some arbitrary

820 investigation) as proposed, but text modifications have been included in the revised  
821 version of manuscript.

822 **Response:**

823 **Thanks for your suggestions. However, only 45 genes of 324 genes in 32 significantly**  
824 **expanded gene families can be assigned GO terms. It makes no sense to conduct**  
825 **additional analysis for the 10 most expanded gene families. So we rephrased this**  
826 **sentence to read: “These genes might be a resource for investigating the specific**  
827 **features of wax gourd”.**

828 Lines 150-153 page 6: Text corrections have been done.

829

830 Lines 163-186 page 7: Text corrections have been done.

831

832 Lines 199-202 page 8: Text corrections have been done.

833

834 I am satisfied by most of the revision performed in the current version of the  
835 manuscript.

836
